# The RASopathy Family: Consequences of Germline Activation of the RAS/MAPK Pathway

Mylène Tajan,<sup>1\*</sup> Romain Paccoud,<sup>1\*</sup> Sophie Branka,<sup>1</sup> Thomas Edouard,<sup>2</sup> and Armelle Yart<sup>1</sup>

<sup>1</sup>INSERM UMR 1048, Institute of Cardiovascular and Metabolic Diseases (I2MC), University of Toulouse Paul Sabatier, 31432, Toulouse, France; and <sup>2</sup>Endocrine, Bone Diseases, and Genetics Unit, Children's Hospital, Toulouse University Hospital, 31059, Toulouse, France

**ABSTRACT** Noonan syndrome [NS; Mendelian Inheritance in Men (MIM) #163950] and related syndromes [Noonan syndrome with multiple lentigines (formerly called LEOPARD syndrome; MIM #151100), Noonan-like syndrome with loose anagen hair (MIM #607721), Costello syndrome (MIM #218040), cardio-facio-cutaneous syndrome (MIM #115150), type I neurofibromatosis (MIM #162200), and Legius syndrome (MIM #611431)] are a group of related genetic disorders associated with distinctive facial features, cardiopathies, growth and skeletal abnormalities, developmental delay/mental retardation, and tumor predisposition. NS was clinically described more than 50 years ago, and disease genes have been identified throughout the last 3 decades, providing a molecular basis to better understand their physiopathology and identify targets for therapeutic strategies. Most of these genes encode proteins belonging to or regulating the so-called RAS/MAPK signaling pathway, so these syndromes have been gathered under the name RASopathies. In this review, we provide a clinical overview of RASopathies and an update on their genetics. We then focus on the functional and pathophysiological effects of RASopathy-causing mutations and discuss therapeutic perspectives and future directions. (*Endocrine Reviews* 39: 676 – 700, 2018)

## Clinical Presentation of RASopathies

**W**ith a cumulative incidence of about 1 per 1000 live births, RASopathies represent one of the largest groups of developmental disorders. In addition to characteristic congenital features, various homeostatic defects in RASopathies have been documented in recent studies. In this section, we describe the phenotypic spectrum of RASopathies, taking Noonan syndrome (NS) as the prototype, then focus on specific traits that distinguish the other syndromes.

### NS as a prototype

First described by the pediatric cardiologist Jacqueline Noonan 50 years ago, NS is among the most common genetic disorders, with an estimated prevalence between 1 per 2000 and 1 per 2500 live births (1). NS is an autosomal-dominant genetic disease characterized by a distinctive phenotypic triad: facial dysmorphic features, cardiopathies, and growth retardation, to which many other developmental defects can be added, including mild to moderate developmental

delay/learning disabilities, skeletal abnormalities, cryptorchidism in males, predisposition to myeloproliferative disorders, and endocrine/metabolic imbalance. Both heterogeneity among patients with NS and redundancy with other RASopathies can make early diagnosis with certainty difficult (2, 3).

Patients with NS have *distinctive facial features* (i.e., hypertelorism, ptosis, downslanting palpebral fissures, low-set posteriorly rotated ears, and short/webbed neck) that are most striking from the newborn period until middle childhood and become less prominent in adulthood (4).

Eighty percent of patients with NS display *congenital heart defects*, ranking it as the second-most common syndromic cause of congenital cardiopathies after trisomy 21. The most frequent heart defects are pulmonary valve stenosis (PVS; 60%) and hypertrophic cardiomyopathy (HCM; 20%), but many other anomalies, such as septal or valve defects, aortic coarctation and, persistently patent arterial duct, are found (5). Fatal heart failure/sudden death during the first year of life is a concern in up to one-fourth of patients with HCM (6). The high prevalence

ISSN Print: 0163-769X

ISSN Online: 1945-7189

Printed in USA

Copyright © 2018

Endocrine Society

Received: 24 October 2017

Accepted: 13 June 2018

First Published Online:

18 June 2018

## ESSENTIAL POINTS

- Noonan syndrome and related genetic diseases constitute one of the largest groups of developmental disorders and are associated, with variable penetrance and severity, with distinctive congenital defects (*i.e.*, facial features, cardiopathies, growth and skeletal abnormalities), developmental delay/mental retardation, and tumor predisposition
- In addition to congenital features, the recent identification of endocrine and metabolic dysfunctions pinpoints the need for an integrated view of the diseases rather than a symptom-directed exploration
- These diseases have been named RASopathies after the discovery of ~20 disease genes, almost all of which encode proteins belonging to or regulating the so-called RAS/MAPK signaling pathway
- Complementary functional analyses have demonstrated the role of RAS/MAPK hyperactivation in driving developmental abnormalities as well as endocrine and metabolic imbalances, although additional signaling dysregulations are also involved
- Despite genetic heterogeneity and complex phenotype/genotype correlations, the different syndromes seem to be characterized by the position of their causal genes within the RAS/MAPK pathway, with mutations hitting the backbone of the cascade associated with a more severe phenotype
- The identification of pathophysiological mechanisms provides insights into the development of specific therapeutic strategies, notably treatment aimed at reducing RAS/MAPK hyperactivation

and mortality of cardiac involvement justify complete cardiac exploration at diagnosis and during follow-up (7).

A cardinal feature of NS, which can lead to diagnosis, is *postnatal proportionate short stature*, reported in 80% of patients. Prenatal growth is classically normal, with birth weight and body length in the normal range. Growth failure usually occurs during early childhood and can result from feeding difficulties, justifying enteral nutrition in one-fifth of infants. During childhood, the mean height in both sexes follows the lower limit of the normal population [third percentile or  $-2$  standard deviation score (SDS)] until the age of puberty, after which it declines further as a result of delayed puberty and attenuated pubertal growth spurts. The final adult height is around  $-2$  SDS in both sexes (8–13). Some patients with NS display normal to elevated serum GH levels associated with low serum IGF-1 levels, suggesting postreceptor GH insensitivity, which has been proposed as an explanation for growth retardation (14).

In addition to growth retardation, low body mass index has been reported in patients with NS from childhood until adulthood. The prevalence of overweight and obesity is lower in patients with NS than in the general adult population (8, 12, 15, 16). This could be related to early feeding difficulties, possibly subsequent to impaired satiety control. However, one study reported changes in body composition affecting both adipose tissues and muscle mass despite normal caloric intake (16).

As mentioned previously, the onset of puberty is usually delayed in patients with NS, with a mean age at pubertal onset of 13.4 years for boys and 13.0 years for girls (17). Gonadal dysfunction with deficient spermatogenesis and impaired fertility has been reported in men with NS (18). This feature may be related to cryptorchidism, which is reported in up to 80% of

males with NS, as well as to Sertoli cell dysfunction (19, 20) and could explain the sex ratio distortion in familial cases (21).

*Skeletal abnormalities* such as pectus and scoliosis are frequent findings in patients with NS, as well as decreased bone mineral density (22, 23).

Mild to moderate *developmental delay/learning disability* is identified in more than half of patients with NS, notably social and communication difficulties, attention deficit, and language impairment (24). However, mental retardation (IQ < 70) is uncommon in patients who have NS, and their intelligence is within the normal range (25, 26).

*Easy bruising and bleeding tendency* can be present, and it is recommended that baseline coagulation screening be carried out, especially before any major surgery. Both coagulation factors and platelet defects have been suggested to explain this bleeding diathesis (27, 28). Whether related diseases share these defects is unknown to date.

Along with an eightfold increased cancer risk, NS is associated with *cancer predisposition*, notably childhood cancers (29). In particular, a higher incidence of juvenile myelomonocytic leukemia (JMML), with frequent neonatal manifestations, has been described in NS (30, 31) (Table 1).

#### Related syndromes: variations from the prototype

*Noonan syndrome with multiple lentiginos (NS-ML)*, formerly named LEOPARD syndrome (according to the acronym, *l*entiginos, *E*CG conduction abnormalities, *o*cular hypertelorism, *p*ulmonic stenosis, *a*bnormal genitalia, *r*etardation of growth, and *s*ensorineural *d*eafness), has an estimated prevalence of fewer than 1 per 100,000 live births. However, the phenotypic redundancy with other RASopathies can make the diagnosis more difficult (32). NS-ML is phenotypically very close to NS but has distinctive

**Table 1. Clinical Features and Genetics of RASopathies**

| Disease                                                                                                       | Epidemiology                                           | Major Symptoms                                                                                                                                                                                                                                                                             | Disease Gene                                                                                                                                                                                                                                                                |
|---------------------------------------------------------------------------------------------------------------|--------------------------------------------------------|--------------------------------------------------------------------------------------------------------------------------------------------------------------------------------------------------------------------------------------------------------------------------------------------|-----------------------------------------------------------------------------------------------------------------------------------------------------------------------------------------------------------------------------------------------------------------------------|
| <b>Noonan syndrome (NS)</b><br>MIM #163950                                                                    | 1/2000                                                 | Dysmorphism                                                                                                                                                                                                                                                                                | <i>PTPN11</i> (50%), <i>SOS1</i> (10%), <i>RAF1</i> (10%),<br><i>KRAS</i> , <i>NRAS</i> , <i>SHOC2</i> , <i>CBL</i> , <i>BRAF</i> , <i>SOS2</i> ,<br><i>RIT</i> , <i>RRAS</i> , <i>RASA2</i> , <i>SPRY1</i> , <i>LZTR1</i> ,<br><i>MAP3K8</i> , <i>MYST4</i> , <i>A2ML1</i> |
|                                                                                                               | Autosomal dominant<br><i>de novo</i> (60%) or familial | Congenital cardiac defects ( <b>PVS 60%</b> ,<br>HCM 20%)<br><br>Skeletal abnormalities, short stature, low<br>BMI<br><br>Delayed puberty, hypogonadism,<br>cryptorchidism<br><br>Developmental delay/learning disability<br><br>Bleeding defects (easy bruising)<br><br>Cancer risk, JMML | Unknown: 20%–30%                                                                                                                                                                                                                                                            |
| <b>Noonan syndrome with<br/>multiple lentigines<br/>(NS-ML, formerly<br/>LEOPARD syndrome)</b><br>MIM #151100 | 1/100,000                                              | Dysmorphism                                                                                                                                                                                                                                                                                | <i>PTPN11</i> (90%), <i>RAF1</i> (5%), <i>BRAF</i>                                                                                                                                                                                                                          |
|                                                                                                               | Autosomal dominant                                     | <b>HCM 80%</b><br><br>Moderate short stature (50%)<br><br>Skeletal abnormalities<br><br>Mild intellectual disability (30%)<br><br><b>Multiple lentigines</b><br><br><b>Deafness (20%)</b>                                                                                                  | Unknown: 5%                                                                                                                                                                                                                                                                 |
| <b>Noonan-like syndrome<br/>disorder with loose<br/>anagen hair (NS-LAH)</b><br>MIM #607721                   | ≈100 reported cases                                    | Dysmorphism                                                                                                                                                                                                                                                                                | <i>SHOC2</i> , <i>PPP1CB</i>                                                                                                                                                                                                                                                |
|                                                                                                               | Autosomal dominant                                     | Cardiac defects ( <b>mitral valve, septal<br/>defects</b> )<br><br>Short stature<br><br><b>Hyperactive behavior</b><br><br><b>Loose anagen hair</b>                                                                                                                                        |                                                                                                                                                                                                                                                                             |
| <b>Costello syndrome (CS)</b><br>MIM #218040                                                                  | 1/400,000                                              | <b>Coarse facial features</b>                                                                                                                                                                                                                                                              | <i>HRAS</i>                                                                                                                                                                                                                                                                 |
|                                                                                                               | Autosomal dominant                                     | Congenital cardiac defects (HCM,<br>arrhythmia)<br><br>Failure to thrive, short stature<br><br><b>Cutaneous defects (deep palmar and<br/>plantar creases)</b><br><br><b>Papillomas</b><br><br><b>Mental retardation</b><br><br><b>Malignant risk (15%)</b>                                 |                                                                                                                                                                                                                                                                             |
| <b>Cranio-facio-cutaneous<br/>syndrome (CFCS)</b>                                                             | 1/200,000                                              | Dysmorphism                                                                                                                                                                                                                                                                                | <i>BRAF</i> (60%), <i>MEK1</i> (10%), <i>MEK2</i> (10%),<br><i>KRAS</i>                                                                                                                                                                                                     |

(Continued)

Table 1. Continued

| Disease                                                                           | Epidemiology                                               | Major Symptoms                                                                                                                                                                      | Disease Gene  |
|-----------------------------------------------------------------------------------|------------------------------------------------------------|-------------------------------------------------------------------------------------------------------------------------------------------------------------------------------------|---------------|
| MIM #115150                                                                       | Autosomal dominant                                         | Congenital cardiac defects (PVS, HCM, arrhythmia)<br>Short stature<br><b>Ectodermal abnormalities</b><br><b>Mental retardation</b>                                                  | Unknown: 15%  |
| Type 1 neurofibromatosis (NF1), also named von Recklinghausen disease, MIM#162200 | 1/3000<br>Autosomal dominant<br>Familial or <i>de novo</i> | Rarer congenital cardiopathies<br><b>Multiple café au lait spots and freckling</b><br><b>Neurofibromas/benign tumors</b><br><b>Iris Lisch nodules</b><br>Mild learning disabilities | NF1 (>90%)    |
| Legius syndrome (LS), MIM#611431                                                  | ≈200 reported cases<br>Autosomal dominant                  | Multiple café au lait spots without <b>neurofibromas</b><br>Mild learning disabilities                                                                                              | SPRED1 (>90%) |

Major clinical traits for the different syndromes are listed (nonexhaustively), with distinctive symptoms in bold. For disease genes, mutation frequency is given for the most common mutations. The percentage of unknown genes corresponds to the number of patients with a firm diagnosis and negative genetic testing for all known disease genes. Abbreviations: BMI, body mass index; LEOPARD, lentiginos, ECG conduction abnormalities, ocular hypertelorism, pulmonic stenosis, abnormal genitalia, retardation of growth, and sensorineural deafness; MIM, Mendelian Inheritance in Men.

features, in particular a high prevalence of hearing deficits (20%) and multiple pigmented skin lesions called lentiginos, mostly starting at school age (90%) and explaining the disrespectful naming of the disease (32). In contrast with the higher prevalence of PVS in patients with NS, the vast majority of patients with NS-ML (80%) display HCM, which can develop during childhood (32–34). The high risk of heart failure or sudden death requires cardiologic follow-up (33, 35–37). Growth retardation seems to be milder than in NS, affecting only ~30% of patients with NS-ML (12, 32, 38, 39) (Table 1). Analyses of a small cohort of patients with NS-ML reported lower-than-average body mass index, with reduced adiposity for the few patients tested (40). Neurosensory deafness seems to be more prominent in NS-ML than in NS.

*Noonan-like syndrome with loose anagen hair (NS-LAH)*, also known as Mazzanti syndrome, is phenotypically close to NS, but patients display distinctive hyperactive behavior and pathognomonic hair anomalies. The incidence of specific cardiac defects, notably mitral valve and septal defects, is higher with NS-LAH than with NS (41).

*Cardio-facio-cutaneous syndrome (CFCS)* shares the major clinical features of NS (e.g., heart defects, short stature, and facial features) but differs from NS mainly in the high frequency of ectodermal anomalies (i.e., thin, curly, friable hair and hyperkeratotic skin changes) and constant mental retardation (42).

In patients who have *Costello syndrome (CS)*, facial features are coarser than in patients with other

RASopathies. They also have skin abnormalities such as soft and loose skin with deep palmar and plantar creases and sparse curly hair. A distinctive and common feature associated with CS is the presence of benign cutaneous papillomas in the perinasal or/and perianal region. Congenital heart defects are frequent, most commonly HCM and arrhythmias. Similar to patients with CFCS, most patients with CS display severe mental retardation (42). Finally, CS has the highest cancer risk among RASopathies, with a cumulative incidence of tumors of 15%, including rhabdomyosarcoma and, less frequently, neuroblastoma and bladder carcinoma (29). This tumor predisposition justifies systematic tumor screening. Recently, increased energy expenditure (EE) has been described in patients with CS, which has been proposed as a cause of growth failure (43).

With an incidence of 1 per 3000 live births, *type I neurofibromatosis (NF1)* is the second-most frequent RASopathy, whereas *Legius syndrome (LS)* is a rare condition. These conditions show only partial overlap with NS, with rarer cardiac manifestations and facial features being found in only a subgroup of patients, referred to as neurofibromatosis–Noonan syndrome. These diseases share distinctive features, including multiple café-au-lait spots and freckling, bone malformations, and mild learning disabilities. In addition, NF1 is characterized by the presence of benign tumors (neurofibromas, optic pathway gliomas, and Lisch nodules) (44, 45).

## Genetics of RASopathies

To date, RASopathies have been associated with mutations in ~20 genes. Most, if not all, genes encode proteins belonging to or regulating the so-called RAS/MAPK signaling pathway, providing a genetic foundation for their diagnosis and for explaining their pathophysiologies. However, genetic heterogeneity for a given syndrome on one side and allelism for several syndromes on the other side make classification harder. In this article, we describe the RAS/MAPK pathway and its pleiotropic roles during development and in homeostasis maintenance; we then summarize the different causal genes and mutations involved in RASopathies and their interconnections and provide some genotype/phenotype correlations.

### The RAS/MAPK pathway

The RAS/MAPK cascade is a ubiquitous signaling pathway activated in response to a wide range of extracellular stimuli (*e.g.*, growth factors, hormones, cell/cell interaction) to modulate various cellular processes (*e.g.*, proliferation, survival, differentiation, migration, or metabolism), thereby adapting cell fate to modification of its environment (Fig. 1). Although this signaling pathway is often summarized as a well-established, straightforward cascade, reality goes far beyond this scholastic view, with many remaining gray areas and multiple levels of regulation, including transcriptional control, posttranslational modifications, protein/protein and protein/lipid interactions, subcellular compartmentalization, and crosstalk with other signaling pathways. In this section, we limit our comments to the components that are relevant to the RASopathies, while referring the readers to more comprehensive reviews for detailed information (46, 47).

A central node in this pathway is the small guanosine triphosphatase (GTPase) RAS proteins, which switch from a guanosine diphosphate-bound inactive state to a guanosine triphosphate (GTP)-bound active state. RAS-GTP activates several effectors, most notably phosphatidylinositol 3-kinase (PI3K), phospholipase C, RAL guanine nucleotide exchange factor, novel Ras effector 1/Ras association domain family member 5, and the RAF kinases. RAS activation is a complex, tightly regulated mechanism for which a canonical, albeit nonexclusive, model can be given in the case of tyrosine kinase receptors (*e.g.*, epidermal growth factor or insulin receptors). Ligand binding to its cognate receptor triggers receptor dimerization and autophosphorylation on several tyrosine residues, creating binding sites for adaptor proteins such as GRB2 or GAB1. This allows recruitment of SOS, the RAS GTPase exchange factor, to the plasma membrane, which converts RAS to its active state. In addition to SOS, the tyrosine phosphatase SHP2 participates in RAS activation by dephosphorylating

several inhibitory phosphotyrosines on docking proteins or on RAS itself (48–50). At the other side of the equation, GTPase-activating proteins (GAPs), such as NF1 and RASA1/p120RASGAP, catalyze GTPase activity of RAS to trigger its return to the inactive state, which can be further reinforced by additional inhibitory events, including receptor ubiquitination by the E3 ubiquitin ligase CBL or sequestration of activating proteins by SPROUTY proteins (51–55). However, such a view is only the tip of the iceberg of RAS regulation, which remains largely unknown given (1) the tremendous number of simultaneous or mutually exclusive interactions among RAS, its effectors, and its regulators; (2) the spatiotemporal and dynamic control of those interactions and of enzymatic activities; and (3) the specific context of the plasma membrane environment.

Among the various RAS-GTP effectors, RAF is the first kinase of the so-called MAPK cascade. Its full activation requires the dephosphorylation of an inhibitory residue by the PP1C phosphatase, which is activated by the SHOC2 protein. RAF phosphorylates and activates the MAPK ERK kinases (MEK) which in turn activate the MAPK Extracellular signal-Regulated Kinases (ERK). Ultimately, activated ERKs phosphorylate different cytoplasmic targets (*e.g.*, MAPK-interacting kinase, a translation regulator) and nuclear targets (*e.g.*, transcription factors, integrator, an RNA polymerase II-associated complex), which initiate appropriate cellular responses to the initial stimulus.

### Roles of the RAS/MAPK pathway

#### Developmental roles

During organismal development, the RAS/MAPK pathway is one of the main pathways to transduce intracellular signals in response to all kinds of mitogens (*e.g.*, growth factors), thereby initiating proliferation, survival, and antiapoptotic programs. Its roles in development are notably highlighted by the profound effect of pharmacological inhibition or genetic invalidation of key actors of this pathway in multiple cell types and animal models. For instance, total invalidation of genes encoding KRAS, SHP2, BRAF, MEK1, or ERK2 result in embryonic lethality as a consequence of early defects such as abnormal placentation or embryonic layer patterning, fetal liver defects, or cardiac anomalies (56–61), and tissue-specific knockouts severely affect the development of the corresponding tissue/organ [for recent reviews, see (54, 62, 63)]. Importantly, dysregulation of RAS/MAPK-dependent developmental processes have profound pathophysiological consequences. Indeed, RAS/MAPK pathway hyperactivation following somatic mutations of genes encoding membrane receptors or actors of the RAS/MAPK pathway has been causally linked to a wide range of cancers, so that approaches

aimed at inhibition of RAS/MAPK activation are currently under evaluation for anticancer therapies (64). Furthermore, in the next section we show the multiple developmental consequences of germline RASopathy-associated mutations of the RAS/MAPK pathway.

### Endocrine and metabolic functions

In addition to the essential roles of the RAS/MAPK pathway during development, evidence has accumulated for its critical functions in regulating organismal homeostasis, in particular the endocrine and metabolic systems. This homeostatic function of the RAS/MAPK cascade is twofold: On one side, it can mediate the response to many hormones acting through membrane RTK (receptors tyrosine kinase) (*e.g.*, insulin, leptin, GH), and on the other side, it can ensure the proper development of many endocrine tissues (*e.g.*, hypothalamus, adipose tissue, pancreas) through tight spatiotemporal regulation (65–67).

Regarding hormone responses, RAS/MAPK activation is required for the leptin-evoked activation of pro-opiomelanocortin neurons, thereby inhibiting food intake and increasing EE (68). Indeed, genetic or pharmacological inhibition of SHP2 or ERK2 in the hypothalamus is associated with leptin resistance in mice, resulting in hyperphagy, decreased EE, and obesity (68, 69). Conversely, hypothalamic expression of a hyperactive mutant of SHP2 results in resistance to obesity and improves glucose homeostasis, a phenotype linked to persistent ERK activation (70). Its roles in insulin signaling are more complex. Indeed, ERK1/2-mediated insulin receptor substrate phosphorylation blunts PI3K/AKT signaling in many insulin-sensitive tissues, thereby promoting insulin resistance (71). Consistent with this, *Erk1*<sup>-/-</sup> and liver-specific *Ptpn11*<sup>-/-</sup> mice both display increased insulin sensitivity (72–75); in addition, chronic treatment with the MEK inhibitor (PD0325901) improves insulin sensitivity in mice fed a high-fat diet and in *ob/ob* mice (76). In contrast, components of the RAS/MAPK pathway have been identified as modifiers of insulin sensitivity through regulation of specific transcriptional programs (77), and muscle invalidation of SHP2 results in insulin resistance, which is associated with RAS/MAPK hypoactivation (78). RAS/MAPK is also mobilized downstream from the GH receptor and negatively regulates the production of IGF-1, the mediator of GH in growth control, both *in vitro* and *in vivo* (79).

RAS/MAPK also has pleiotropic roles in the development and function of endocrine and metabolic tissues. For instance, RAS/MAPK signaling participates in the development of the nervous system, affecting the production of and/or the response to neuroendocrine signals (80). Regarding adipose tissue, studies in cellular models and knockout mice revealed an important role for ERK1 and SHP2 in adipogenesis, resulting in both poor lipid management and defective

adipokine (*e.g.*, leptin) production (75, 81), whereas treatment with MEK inhibitors suggested a positive role for MAPK in lipolysis (82, 83). SHP2 and ERK1/2 also play a positive role in pancreatic  $\beta$ -cell development and insulin synthesis or secretion (67, 84). In addition, components of the RAS/MAPK pathway are involved in ovarian and testis development and/or function, as disruption of ERK1/2 in ovarian granulosa cells impairs female fertility (85), whereas invalidation of SHP2 in Sertoli cells alters spermatogenesis and reduces FSH and testosterone production (86).

Interestingly, at the crossroad between proliferation and homeostasis, studies in the context of cancer biology have also highlighted a logical role for RAS/MAPK in triggering metabolism rewiring to anabolic programs through various processes, including the Warburg effect, autophagy, and macropinocytosis (87–92).

### Germline mutations in the RAS/MAPK pathway, functional heterogeneity, allelism, and genotype/phenotype correlations

The first identified and major NS disease gene is the protein tyrosine phosphatase non-receptor type 11 (*PTPN11*), encoding SHP2, which is found mutated in 50% to 60% of patients with NS. Genetic screening efforts in patients with non-*PTPN11* NS revealed less common or rare mutations in a dozen genes related to the RAS/MAPK pathway [*SOS1* (10%), *RAF1* (10%), *KRAS*, *NRAS*, *BRAF*, *SHOC2*, *CBL*, *RIT*, *RRAS*, *RASA2*, *SOS2*, and *SPRY1*] to which several genes with yet unknown or RAS/MAPK-unrelated function can be added [*MAP3K8*, *MYST4*, *LZTR1*, and *A2ML1*; see (93) for a recent review]. Biallelic mutations in *LZTR1* were recently associated with an autosomal recessive form of NS (94). To date, 20% to 30% of patients with NS still lack a genetic diagnosis (93, 95). NS is thus the most genetically heterogeneous RASopathy, but also the most frequent, which may facilitate the identification of new disease genes and also allows the identification of genotype/phenotype correlations. Thus, when compared with *PTPN11*, *BRAF* mutations are associated with a more severe phenotype and a higher prevalence of HCM (96). Regarding cardiopathies, patients with *RAF1*, *RIT*, and *MRAS* mutations also develop more HCM (97–100), whereas *MEK1*, *KRAS*, and *SOS1* mutations tend to be highly associated with PVS (101). *SOS1/2* mutations are linked to a higher frequency of ectodermal anomalies and normal stature (12, 102, 103). The prevalence of cognitive/developmental delay is lower for *SOS1/2* mutations but higher for *RAF1*, *BRAF*, and *SHOC2* mutations (100). Finally, *RIT* and *CBL* mutations are associated with JMML, the latter also linked to low prevalence of cardiac defects, reduced growth, and cryptorchidism (104, 105).

The vast majority of patients with NS-ML (85%) harbor mutations within *PTPN11*. The remaining NS-ML cases are causally linked to *RAF1* and *BRAF*

---

"Patients with NS have distinctive facial features."

---

**Figure 1.** The RAS/MAPK pathway and the RASopathies disease genes. Simplified scheme depicting the canonical RAS/MAPK signaling pathway activated by receptors tyrosine kinase (RTK). Gray rectangles represent proteins (with corresponding genes italicized). Once activated by its ligand, an RTK autophosphorylates on tyrosine residues, creating binding sites for the adaptor protein GRB2 and the relocalization of SOS to the plasma membrane. RAS switches from a GDP-bound to a GTP-bound state, upon which it initiates the RAF>MEK>ERK phosphorylation cascade. RAS intrinsic GTPase activity hydrolyzes GTP to GDP, a reaction that is catalyzed by p120RASGAP. This signaling pathway is modulated at several levels: (1) SHP2 participates in RAS activation by dephosphorylating several inhibitory phosphotyrosines, such as the docking site for p120RASGAP borne by GAB1 and the tyrosine on RAS that mediates its interaction with p120RASGAP; (2) the scaffold protein SHOC2 mediates the activation of the PP1C phosphatase, which dephosphorylates an inhibitory residue on RAF; (3) SPROUTY proteins negatively regulate the RAS/MAPK pathway by sequestering RAS activators; and (4) CBL drives RTK ubiquitination, which turns off activating signals. Colored ovals encompass major disease genes for each RASopathy and reveal function/phenotype associations: In blue, NS and NS-like syndromes (NS-ML, NS-LAH) are caused mainly by mutations on RAS/RAF activators. In orange/pink, NF1 and LS are associated with RAS inhibitors. In yellow and green, mutations responsible for CS and CFCS affect the RAS/MAPK backbone. From a functional point of view, it seems that mutations hitting the low/central part of the signaling pathway give rise to more severe phenotypes. For better readability, some NS-associated genes are not covered by the blue oval but are written in blue, and disease genes unrelated to the RAS/MAPK pathway are not shown. CBL, Casitas B-lineage lymphomas; ERK, extracellular signal-regulated kinase; GAB1, Grb2 adaptor binder 1; GDP, guanosine diphosphate; GRB2, growth factor receptor-bound protein 2; GTP, guanosine triphosphate; MEK, MAPK/ERK kinase; PP, protein phosphatase; RAF, rapidly accelerated fibrosarcoma; SHOC2, Soc-2 homolog; SOS, son of sevenless.

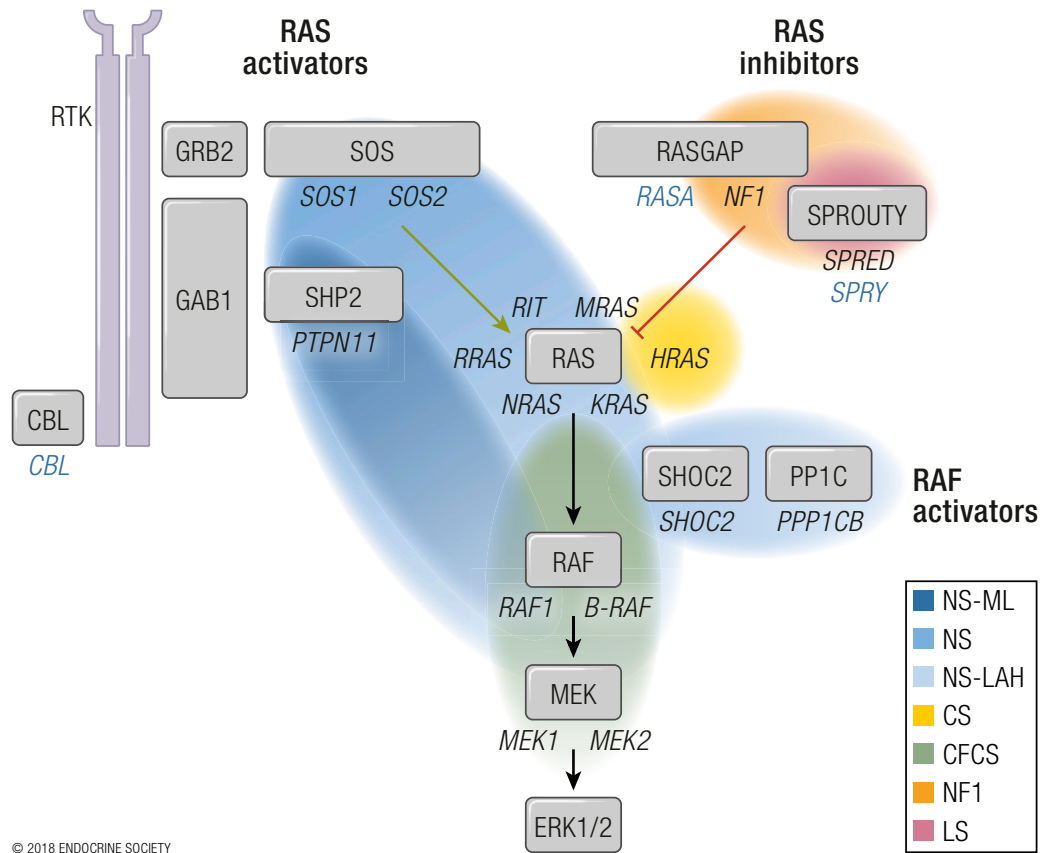

mutations, which are associated with a more severe phenotype (96).

The main CFCS disease gene is *BRAF* (60%), but a substantial proportion of patients carry mutations on *MEK1* (10%), *MEK2* (10%), and *KRAS*. CFCS congenital heart defects, particularly mitral valve and septal defects, and ocular anomalies seem to be less frequent among patients with *MEK1/MEK2* mutations (106).

The other RASopathies are more genetically homogeneous, with mutations in the *HRAS* gene for almost all patients with CS, a unique mutation on

*SHOC2*, and more recently mutations in *PPP1CB* found in patients with NS-LAH (41, 107), mutations in *SPRED1* for LS, and heterozygous loss-of-function (LOF) mutations or deletions of the *NF1* gene in more than 90% of NF1 cases (44, 45).

Adding further complexity to the genetic heterogeneity, several RASopathies are allelic diseases. Thus, *PTPN11* mutations are associated with NS (85%) and NS-ML (15%); *SOS1* mutations with NS and CS/CFCS; *KRAS* mutations with NS and CFCS; *BRAF* mutations with CFCS, CS, NS-ML, and NS; *RAF1* mutations with NS and NS-ML; and *MEK1* mutations with CFCS, CS,

and NS. This allelism identifies important signaling nodes and may explain the partial overlap and the phenotypic continuum between these related syndromes. However, we show in the next section that functional analyses also revealed syndrome-specific properties for several mutants, which certainly explains the uniqueness of each RASopathy.

Thus, from a functional point of view, specificities emerge for the different syndromes: NS, NS-ML, and NS-LAH are mainly associated with positive regulators of the RAS/MAPK cascade (*i.e.*, RAS or RAF activators), whereas NF1 and LS are linked to RAS inhibitors. In contrast, CS- and CFCS-causing mutations hit the backbone of the cascade, CS being centered on RAS and CFCS on downstream kinases (Fig. 1). At the risk of overstatement, a tendency emerges in which mutations hitting the central or low part of the cascade give rise to more severe conditions, which may reflect the fact that downstream effectors of the pathway are more unescapable, with higher effect of their dysregulation, than proximal actors, which receive several levels of regulation and can be bypassed.

### Functional and Pathophysiological Consequences of RASopathy-Associated Mutations

Functional analyses have been performed for a growing number of mutations, both *in vitro* and in animal models of RASopathies, leading to the general concept of RAS/MAPK hyperactivation as a pathogenic mechanism. Thus, sustained RAS/MAPK activation has been causally linked to the abnormal development of several tissues, leading to some congenital symptoms (*e.g.*, cardiac or craniofacial defects), as well as altered response to different hormones, giving rise to endocrine dysfunctions (*e.g.*, growth hormone insensitivity and growth retardation). However, controversies exist, and the contribution of RAS/MAPK-independent dysfunctions has been demonstrated in several models, which may explain the differences between syndromes.

#### Functional consequences of RASopathy-causing mutations on the RAS/MAPK pathway

Complementary approaches in functional genetics have been and still are useful for delineating the consequences of RASopathy-associated mutations. Thus, *in silico* modeling and biochemical analyses led to the identification of structural changes or modifications of enzymatic activity, protein stability, or protein/protein interaction. Ectopic expression of mutated proteins in cellular models and analyses of patient cells, including skin fibroblasts and induced pluripotent stem cells (iPSCs), then allowed understanding of how the mutations alter signaling pathways and cellular functions. Finally, their global

effect at the organismal level has been comprehended thanks to the development of animal models of the diseases, in invertebrates (*Caenorhabditis elegans*, *Drosophila*) as well as in vertebrates (*Xenopus*, zebrafish and mouse) [see (54, 95, 108, 109) for recent reviews and Table 2].

Approximately 70 different NS-causing *PTPN11* mutations that hit residues within or close to the SH2 and protein tyrosine phosphatase (PTP) domains and result in increased phosphatase activity through different mechanisms (*e.g.*, release of auto-inhibitory constraints, increased recruitability) have been identified [reviewed in (54)] (Fig. 2). Interestingly, some studies have started to identify mutation/phenotype correlations; for instance, mutations of Asp61 or Thr71 are preferentially associated with myeloproliferative disorders/JMML (30), whereas Leu261, Leu262, and Arg265 mutations are associated with milder form of NS (170). Coherent with the positive role of SHP2 on the RAS/MAPK pathway, functional analyses have shown that activating, NS-associated, SHP2 mutations hyperactivate ERK1/2. This effect has been repeatedly reported in different cell types *in vitro*, in the basal state as well as under stimulation by several agonists, and in different tissues/organs in animal models (114, 130, 171–174).

In contrast to NS, the pattern of NS-ML-associated *PTPN11* mutations is restricted to conserved residues within the PTP domain that are required for PTP activity (*e.g.*, Tyr279, Thr468, Gln510). All NS-ML-causing mutations collapse the phosphatase activity of SHP2 under both basal and stimulated states (151, 175–180). However, these mutations are not merely LOF because (1) they retain substantial activity and are stimutable and (2) true LOF mutations of *PTPN11* are associated with a distinct syndrome named metachondromatosis (Mendelian Inheritance in Men #156250). The effect of NS-ML-associated *PTPN11* mutations on the RAS/MAPK pathway is highly debated. Indeed, consistent with the reduced phosphatase activity of the mutants, overexpression of NS-ML-causing SHP2 mutants in HEK cells or in zebrafish embryos has reduced ERK1/2 activation in response to several agonists (134, 177, 181). Moreover, a mouse model of NS-ML carrying the Y279C mutation on SHP2 (*Ptpn11*<sup>Y279C/+</sup>) also displayed hypoactivation of ERK1/2 in the heart in response to insulin or IGF-1 (151). In contrast, different reports highlighted that NS-ML-associated SHP2 mutants can have a dominant positive effect on RAS/MAPK activation. Indeed, expression of NS-ML mutants in flies and zebrafish hyperactivated ERK1/2 to a similar extent as NS-associated mutants did, interestingly enough resulting in a comparable phenotype for both types of mutations (114, 115, 130). Moreover, basal or agonist-induced MEK/ERK1/2 hyperactivation was measured in cells overexpressing NS-ML mutants in an original model of iPSC-derived



**Table 2. Complementarity of Animal Models of RASopathies**

| Disease                              | Mutation                                            | Strategy                | Expression Pattern               | Phenotype                                                                                 | Mechanisms                                                | Reference           |
|--------------------------------------|-----------------------------------------------------|-------------------------|----------------------------------|-------------------------------------------------------------------------------------------|-----------------------------------------------------------|---------------------|
| <b><i>Caenorhabditis elegans</i></b> |                                                     |                         |                                  |                                                                                           |                                                           |                     |
| NS-ML                                | <i>Ptp-2</i> LOH                                    | Deletion                | Vulva                            | Semisterility/vulval induction                                                            |                                                           | (110)               |
| NS-LAH                               | <i>Shoc</i> <sup>S2G</sup>                          | DNA microinjection      | Vulva                            | Protruding vulva                                                                          | Increased RAS/MAPK                                        | (107)               |
| CS                                   | <i>Let-60/Ras</i> GOF                               | DNA microinjection      | Vulva                            | Multivulva                                                                                | Increased RAS/MAPK                                        | (111)               |
| CFCS                                 | <i>Mek2</i> GOF                                     | DNA microinjection      | Vulva                            | Multivulva                                                                                | Increased RAS/MAPK                                        | (112)               |
| <b><i>Drosophila</i></b>             |                                                     |                         |                                  |                                                                                           |                                                           |                     |
| NS                                   | <i>Csw</i> <sup>D61Y, E76K</sup>                    | Overexpression          | Mushroom body neurons            | Long-term memory defects                                                                  | Increased RAS/MAPK                                        | (113)               |
|                                      | <i>Csw</i> <sup>A72S, N308D, E76K</sup>             | Overexpression          | Wing, eye                        | Ectopic veins                                                                             | Increased RAS/MAPK                                        | (114)               |
| NS-ML                                | <i>Csw</i> <sup>Y279C, T468M</sup>                  | Overexpression          | Wing, eye                        | Ectopic veins                                                                             | Increased RAS/MAPK                                        | (115)               |
| NS/CS/CFCS                           | <i>Ras</i> <sup>R68Q</sup>                          | Mutagenesis             | Eye, wing, glia                  | Ectopic veins, resistance to cell death                                                   | Increased RAS/MAPK                                        | (116)               |
| CS                                   | <i>Ras</i> <sup>G12V</sup>                          | Overexpression          | Heart                            | Cardiac hypertrophy                                                                       | Increased RAS/MAPK                                        | (117)               |
| NF1                                  | <i>Nf</i> <sup>-/-</sup>                            | Insertion of P element  | Ubiquitous                       | Reduced pupae size, shortened life span, abnormal circadian rhythm                        | Increased RAS/MAPK, mitochondria ROS, impaired cAMP       | (118–120)           |
|                                      |                                                     |                         | Nervous system                   | Defective in memory acquisition                                                           | Impaired cAMP                                             | (121–123)           |
|                                      |                                                     |                         | Postmitotic larval brain neurons | Reduced growth, synaptic overgrowth                                                       | Impaired cAMP                                             | (124, 125)          |
| <b><i>Xenopus</i></b>                |                                                     |                         |                                  |                                                                                           |                                                           |                     |
| NS                                   | <i>Ptpn11</i> <sup>N308D</sup>                      | mRNA injection          | Heart                            | Rescue of $\Delta$ Shp2-dependent cardiac defects                                         |                                                           | (126)               |
| CS                                   | CA <i>Ras</i>                                       | mRNA injection          | Ubiquitous                       | Mesoderm induction during early embryogenesis                                             | Increased RAS/MAPK                                        | (127)               |
| CFCS                                 | CA <i>Raf</i> or <i>Mek</i>                         | mRNA injection          | Ubiquitous                       | Mesoderm induction during early embryogenesis                                             | Increased RAS/MAPK                                        | (127–129)           |
| <b><i>Zebrafish</i></b>              |                                                     |                         |                                  |                                                                                           |                                                           |                     |
| NS                                   | <i>Ptpn11</i> <sup>D61G, T73I</sup>                 | mRNA injection          | Ubiquitous                       | Craniofacial and heart defects                                                            | Increased RAS/MAPK Src dependent signaling                | (130, 131)          |
|                                      | <i>NRas</i> <sup>I24N</sup>                         | Synthetic RNA injection | Ubiquitous                       | Gastrulation and craniofacial defects                                                     | Increased RAS/MAPK                                        | (132)               |
|                                      | <i>KRas</i> <sup>N116S</sup>                        | Synthetic RNA injection | Ubiquitous                       | Craniofacial dysmorphia, heart defects                                                    | Increased RAS/MAPK                                        | (133)               |
| NS-ML                                | <i>Ptpn11</i> <sup>A462T, G465A, Y279C, T468M</sup> | mRNA injection          | Ubiquitous                       | Craniofacial and heart defects                                                            | Increased RAS/MAPK Src dependent signaling, PZR dependent | (130, 131, 134–136) |
| CS                                   | <i>Ras</i> <sup>G12V</sup>                          | mRNA injection          | Ubiquitous                       | Tumors, reduced size and life span, smaller heart, and craniofacial defects in adult fish |                                                           | (137)               |

(Continued)

Table 2. Continued

| Disease                      | Mutation                              | Strategy                               | Expression Pattern                                                                | Phenotype                                                                                       | Mechanisms                         | Reference  |
|------------------------------|---------------------------------------|----------------------------------------|-----------------------------------------------------------------------------------|-------------------------------------------------------------------------------------------------|------------------------------------|------------|
| CFCS                         | <i>BRaf</i> , <i>Mek1/2</i> mutations | Microinjection of patient-derived mRNA | Ubiquitous                                                                        | Developmental abnormalities                                                                     | Increased RAS/MAPK                 | (138)      |
| NF1                          | <i>Nf1a/b</i> knockdown               | Morpholinos                            | Heart/vessels                                                                     | Cardiovascular defects                                                                          | Increased RAS/MAPK                 | (139)      |
|                              | <i>Nf1a/b</i> <sup>-/-</sup>          | Targeted mutagenesis                   | Neurons                                                                           | Myelination defects, learning deficits                                                          | Increased RAS/MAPK                 | (140, 141) |
| <b>Mouse</b>                 |                                       |                                        |                                                                                   |                                                                                                 |                                    |            |
| NS                           | <i>Ptpn11</i> <sup>D61G</sup>         | KI                                     | Germline                                                                          | Short stature, craniofacial defects, cardiac defect, MPD, cognitive deficits                    | Increased RAS/MAPK                 | (79, 142)  |
|                              | <i>Ptpn11</i> <sup>N308D</sup>        | KI                                     | Germline                                                                          | Cardiac defects, growth retardation, craniofacial defects, hematological problems in homozygous | Increased RAS/MAPK                 | (143)      |
|                              | <i>Ptpn11</i> <sup>D61Y</sup>         | Conditional KI                         | Germline                                                                          | Severe cardiac defects                                                                          | Increased RAS/MAPK                 | (143)      |
|                              |                                       |                                        | Neural crest                                                                      | Craniofacial defects                                                                            | Increased RAS/MAPK                 | (143)      |
|                              |                                       |                                        | Endothelial                                                                       | Cardiac defects                                                                                 | Increased RAS/MAPK                 | (143)      |
|                              |                                       |                                        | Myocardial                                                                        | No phenotype                                                                                    | Increased RAS/MAPK                 | (143)      |
|                              |                                       |                                        | Forebrain                                                                         | Cognitive deficits                                                                              | Increased RAS/MAPK                 | (144)      |
|                              | <i>Ptpn11</i> <sup>D61A</sup>         | Conditional KI                         | Neuronal                                                                          | Obesity resistance (in female)                                                                  | Increased p38                      | (70)       |
|                              | <i>Ptpn11</i> <sup>Q79R</sup>         | Additive transgenesis                  | Myocardial adult                                                                  | No phenotype                                                                                    | Increased RAS/MAPK                 | (145)      |
|                              |                                       |                                        | Myocardial fetal                                                                  | Cardiac defects                                                                                 | Increased RAS/MAPK                 | (145)      |
|                              |                                       | Conditional transgenic                 | Neural crest                                                                      | Craniofacial defects                                                                            | Increased RAS/MAPK                 | (146)      |
|                              |                                       |                                        | Endothelial                                                                       | Cardiac defects                                                                                 | Increased RAS/MAPK                 | (146)      |
|                              | <i>Sos1</i> <sup>E846K</sup>          | Conditional KI                         | Germline                                                                          | Cardiac defects, growth retardation, craniofacial defects, hematological problems in homozygous | Increased RAS/MAPK, Rac, and Stat3 | (147)      |
|                              | <i>Raf</i> <sup>L613V</sup>           | Conditional KI                         | Germline                                                                          | Cardiac defects (HCM), growth retardation, craniofacial defects, hematological problems         | Increased RAS/MAPK                 | (148)      |
|                              |                                       |                                        | Endothelial                                                                       | HCM                                                                                             | Increased RAS/MAPK                 | (149)      |
| Cardiomyocyte                |                                       |                                        | Impaired contractility                                                            | Increased RAS/MAPK                                                                              | (149)                              |            |
| <i>K-Ras</i> <sup>V14I</sup> | Conditional KI                        | Germline                               | Cardiac defects, growth retardation, craniofacial defects, hematological problems | Increased RAS/MAPK                                                                              | (150)                              |            |
| NS-ML                        | <i>Ptpn11</i> <sup>Y279C</sup>        | Conditional KI                         | Germline                                                                          | HCM, growth delay, skeletal defects, dysmorphia, abnormal genitalia, sensorineural defects      | Increased AKT/mTOR                 | (151)      |
|                              |                                       |                                        | Endothelial                                                                       | Trabeculation and valvular hyperplasia                                                          | Increased AKT/mTOR                 | (152)      |
|                              |                                       |                                        | Cardiomyocyte                                                                     | Ventricular septal defects                                                                      | Increased AKT/mTOR                 | (152)      |

(Continued)

Table 2. Continued

| Disease          | Mutation                       | Strategy                              | Expression Pattern                              | Phenotype                                                                                                                 | Mechanisms                                | Reference                 |
|------------------|--------------------------------|---------------------------------------|-------------------------------------------------|---------------------------------------------------------------------------------------------------------------------------|-------------------------------------------|---------------------------|
|                  | <i>Ptfn11</i> <sup>T468M</sup> | KI                                    | Germline                                        | HCM, growth delay, dysmorphia, reduced adipogenesis, increased EE, improved insulin sensitivity                           | Increased RAS/MAPK and AKT/mTOR           | (40)                      |
|                  | <i>Ptfn11</i> <sup>Q510E</sup> | Additive transgenesis                 | Myocardial fetal                                | HCM                                                                                                                       | Increased mTOR                            | (153)                     |
| Myocardial adult |                                |                                       | No phenotype                                    | Increased mTOR                                                                                                            | (153)                                     |                           |
| Endothelial      |                                |                                       | Increased atrioventricular endocardial cushions | Increased mTOR                                                                                                            | (154)                                     |                           |
| CS               | <i>H-Ras</i> <sup>G12V</sup>   | Conditional KI                        | Germline                                        | Model 1: facial dysmorphia, HCM, systemic hypertension, vascular remodeling, fibrosis, neurocognitive deficits, no cancer | No change in RAS/MAPK and Akt             | (155)                     |
|                  |                                |                                       |                                                 | Model 2: cranial dysmorphia, no heart defects, tumors                                                                     |                                           | (156)                     |
| CFCS             | <i>B-Raf</i> <sup>V600E</sup>  | Conditional KI                        | Germline                                        | Reduced life span, growth defect, facial dysmorphism, cardiomegaly, epileptic seizures, neuroendocrine tumors             | No change in RAS/MAPK                     | (157)                     |
|                  | <i>B-Raf</i> <sup>L597V</sup>  | Conditional KI                        | Germline                                        | Short stature, facial dysmorphia, HCM                                                                                     | Increased RAS/MAPK                        | (158)                     |
|                  | <i>B-Raf</i> <sup>Q241R</sup>  | Conditional KI                        | Germline                                        | Embryonic/neonatal lethality, heart defects, liver necrosis, edema, craniofacial abnormalities, lymphatic defects         | Increased RAS/MAPK, decreased p38 and AKT | (159)                     |
|                  | <i>Mek1</i> <sup>Y130C</sup>   | KI                                    | Germline                                        | Pulmonary artery stenosis, cranial dysmorphia, neurologic anomalies                                                       | Increased RAS/MAPK                        | (160)                     |
| NF1              | <i>Nf1</i> <sup>+/-</sup>      | KO                                    | Germline                                        | Mild bone defects, deficits in learning, pheochromocytomas (embryonic lethality for <i>Nf1</i> <sup>-/-</sup> )           | PI3K/mTOR/AKT pathway                     | (161, 162)                |
|                  |                                |                                       |                                                 |                                                                                                                           |                                           | <i>Nf1</i> <sup>-/-</sup> |
|                  | Myocardial                     | Cardiac defects                       | RAS/MAPK pathway                                | (164)                                                                                                                     |                                           |                           |
|                  | MSC                            | Skeletal malformations                | RAS/MAPK pathway                                | (165)                                                                                                                     |                                           |                           |
|                  | Neuronal                       | Brain malformation, learning deficits | PI3K/mTOR/AKT pathway                           | (166)                                                                                                                     |                                           |                           |
|                  | Schwann cells                  | Neurofibromas                         | PI3K/mTOR/AKT pathway                           | (167)                                                                                                                     |                                           |                           |
|                  | Myeloid                        | JMML                                  | PI3K/mTOR/AKT pathway                           | (168)                                                                                                                     |                                           |                           |
| LS               | <i>Spred1</i> <sup>-/-</sup>   | KO                                    | Germline                                        | Facial dysmorphia, deficits in learning and memory, smaller body weight, hematologic alteration                           | Increased RAS/MAPK and JAK2               | (169)                     |

Because of their simple morphology and short life cycle, *C. elegans* and *Drosophila* are useful for high-throughput and quantitative studies; *Xenopus* and zebrafish help monitor developmental defects. Mice are commonly used to reproduce phenotypes of human RASopathies.

Abbreviations: CA, constitutively active; GOF, gain of function; KI, knockin; KO, knockout; MPD, myeloproliferative disorder.

cardiomyocytes from patients with NS-ML and in tissues from mice expressing NS-ML-causing SHP2 mutants (*Ptpn11*<sup>Q510E</sup>, *Ptpn11*<sup>T468M/+</sup>) (40, 153, 180, 182). Although unexpected from biochemical studies, this gain-of-function effect of NS-ML mutants on RAS/MAPK activation could result from their increased sensitivity to activating stimuli and sustained binding to upstream regulators, which could counterbalance their residual activity, thereby conferring signal-enhancing properties on them (180). The fact that the NS-ML-associated SHP2 mutant can hyperactivate RAS/MAPK, at least upon some conditions that remain to be identified, could explain the phenotypic similarities between NS-ML and NS and other RASopathies.

Various mutation clusters destabilizing regions of the SOS proteins that contribute structurally to the maintenance of their autoinhibited state were found in *SOS1* and to a lesser extent in *SOS2* as causes of NS (102, 103). One mutation (T158A) was also identified in patients with CS/CFCS (183). Functional studies revealed a higher level of GTP-bound RAS and higher ERK1/2 phosphorylation in cells expressing *SOS1* and *SOS2* mutants (103, 184–187), as well as in cardiac tissues from mice expressing the NS-associated E846K variant of *SOS1* (147). Whether NS-causing and CS/CFCS-causing SOS mutants differentially affect SOS activity or affect additional mechanisms is unknown; however, it was recently shown that NS-causing *SOS1* mutations hitting distinct functional domains differentially modified SOS affinity for plasma membranes (188).

Mutations of the different members of the RAS GTPase family have been found in the nucleotide binding site or in structural domains involved in its inactive-to-active conformational change. They give rise to reduced GTPase activity or favor the active conformation, respectively. Thus, CS-associated *HRAS* mutations affect mainly Gly12 or Gly13, which reduced its GTPase activity, resulting in active RAS accumulation and ERK1/2 hyperactivation. Sustained RAS/MAPK activation was also detected in tissues from CS mice (*HRas*<sup>G12V/+</sup>), notably in the liver and the brain (155, 156, 189). Interestingly, another mutation in *HRAS*, resulting in aberrant *HRAS* transcript processing and modification of its subcellular localization, was recently identified and is associated with a distinctive, mild CS phenotype (190). *KRAS* mutations, associated with NS, CS, and CFCS, also lead to RAS/MAPK hyperactivation *in vitro* through different molecular mechanisms, ranging from reduction of its GTPase activity to GAP hyposensitivity or GTPase exchange factor hypersensitivity. Functional studies also suggest that CS-causing and CFCS-causing *KRAS* mutations are stronger than NS-associated modifications (191, 192). *KRAS*<sup>V14I/+</sup> NS mice also display RAS/MAPK hyperactivation in some tissues (150). Mutations of *RIT*, *RRAS*, *NRAS*, and *MRAS*, more

recently found in a small fraction of patients with NS, all result in decreased GTPase activity and subsequent RAS/MAPK hyperactivation (97, 193–196).

For the RAF proteins, mutations affect distinct domains for *RAF1* and *BRAF*. For both proteins, mutations can occur in the kinase domain, also called conserved region (CR) 3. Specific mutations in the CR1 domain of *BRAF*, which are involved in the RAS/*BRAF* interaction, have also been identified, and several *RAF1* mutations cluster in the CR2. The latter are located close to a regulatory phosphorylation site involved in an inhibitory interaction with the 14-3-3 protein. Surprisingly, although most of the mutations are activating and result in RAS/MAPK hyperactivation *in vitro* and *in vivo*, several *BRAF* and *RAF1* mutants are kinase impaired. Wu *et al.* (197) demonstrated that such defective *RAF1* mutants display increased capability to heterodimerize with *BRAF*, resulting in a net increase of the dimer. Comparative analysis suggests that CFCS-associated *BRAF* mutations are stronger than those causing NS or NS-ML (138, 157–159, 198, 199).

Mutations of *MEK1* and *MEK2* hit the negative regulatory region or the catalytic core domain of the kinases, resulting in increased kinase activity and gain-of-function effect on the RAS/MAPK pathway (106, 138, 160, 198, 200).

The NS-LAH-associated *SHOC2* mutation (S) has been found to create a myristoylation site, thereby resulting in constitutive translocation of *SHOC2* to specific domains in the plasma membrane and prolonged PP1C activation. Subsequent *BRAF/RAF1* dephosphorylation promotes sustained MAPK activation (107, 201). Mutations of *PPP1CB* encoding one of the catalytic subunits of PP1C are thought to directly or indirectly enhance PP1C phosphatase activity, leading to RAF/MEK/ERK hyperactivation, although this has not been demonstrated yet (41).

The mutations identified in the *NF1*, *SPRED1*, and *SPRY* genes mostly give rise to truncated, non-functional proteins [reviewed in (44, 45, 196)]. Some specific *NF1* mutants (*e.g.*, those affecting Arg1809) are associated with NS features (202). NS-causing *RASA2* mutations affect two different conserved residues that are thought to alter GAP activity (203). *CBL* missense mutations impair the E3 ubiquitin ligase activity of the protein or its stability (104). Most of these mutations have been found to increase MAPK signaling through different mechanisms (*e.g.*, reduction of the GAP activity of *NF1* or *RASA2* and maintenance of RAS-GTP, decreased receptor turnover for *CBL* mutations, or loss of the *SPROUTY* inhibitory effect).

Altogether, RASopathy-causing mutations seem to have an activating effect on the RAS/MAPK pathway, but many modulatory events have to be taken into account. First, most of the mutations have complex and subtle consequences that result in a more qualitative than quantitative dysfunction of the RAS/

**Figure 2.** Structure of components of the RAS/MAPK pathway and RASopathy-causing mutations. The functional domains of the main proteins mutated in the different RASopathies are depicted, highlighting the major RASopathy-causing mutations (left panel). For each protein, the proportion of mutations associated with the different syndromes is shown [right panel; blue, NS and NS-like syndromes (NS-ML, NS-LAH); yellow, CS; green, CFCS; orange, NF1; pink, LS]. CDC25, CDC25 homology domain; CRD, cysteine -rich domain; CSRD, cysteine/serine-rich domain; CTD, carboxy-terminal domain; DH, Dbl homology domain; EVH1, enabled/vasodilator-stimulated phosphoprotein homology-1; GRD, GAP-related domain; HD, histone-like domain; HL, helical linker; KBD, c-Kit-binding domain; KEKE motif, region enriched in alternating lysine and glutamate/aspartate residues; LRR, leucine-rich region; NES, nuclear export signal; NRR, negative regulatory region; PH, Pleckstrin homology domain; P loop, phosphate-binding loop; PR, proline-rich region; PTP, protein-tyrosine-phosphatase domain; REM, Ras exchanger motif; Sec14-PH, homologous to the *Saccharomyces cerevisiae* phosphatidylinositol transfer protein Sec14p-pleckstrin homology domain; SH2, Src homology 2 domain; SW1 and SW2, switch region 1 and 2; TBD, tubulin-binding domain.

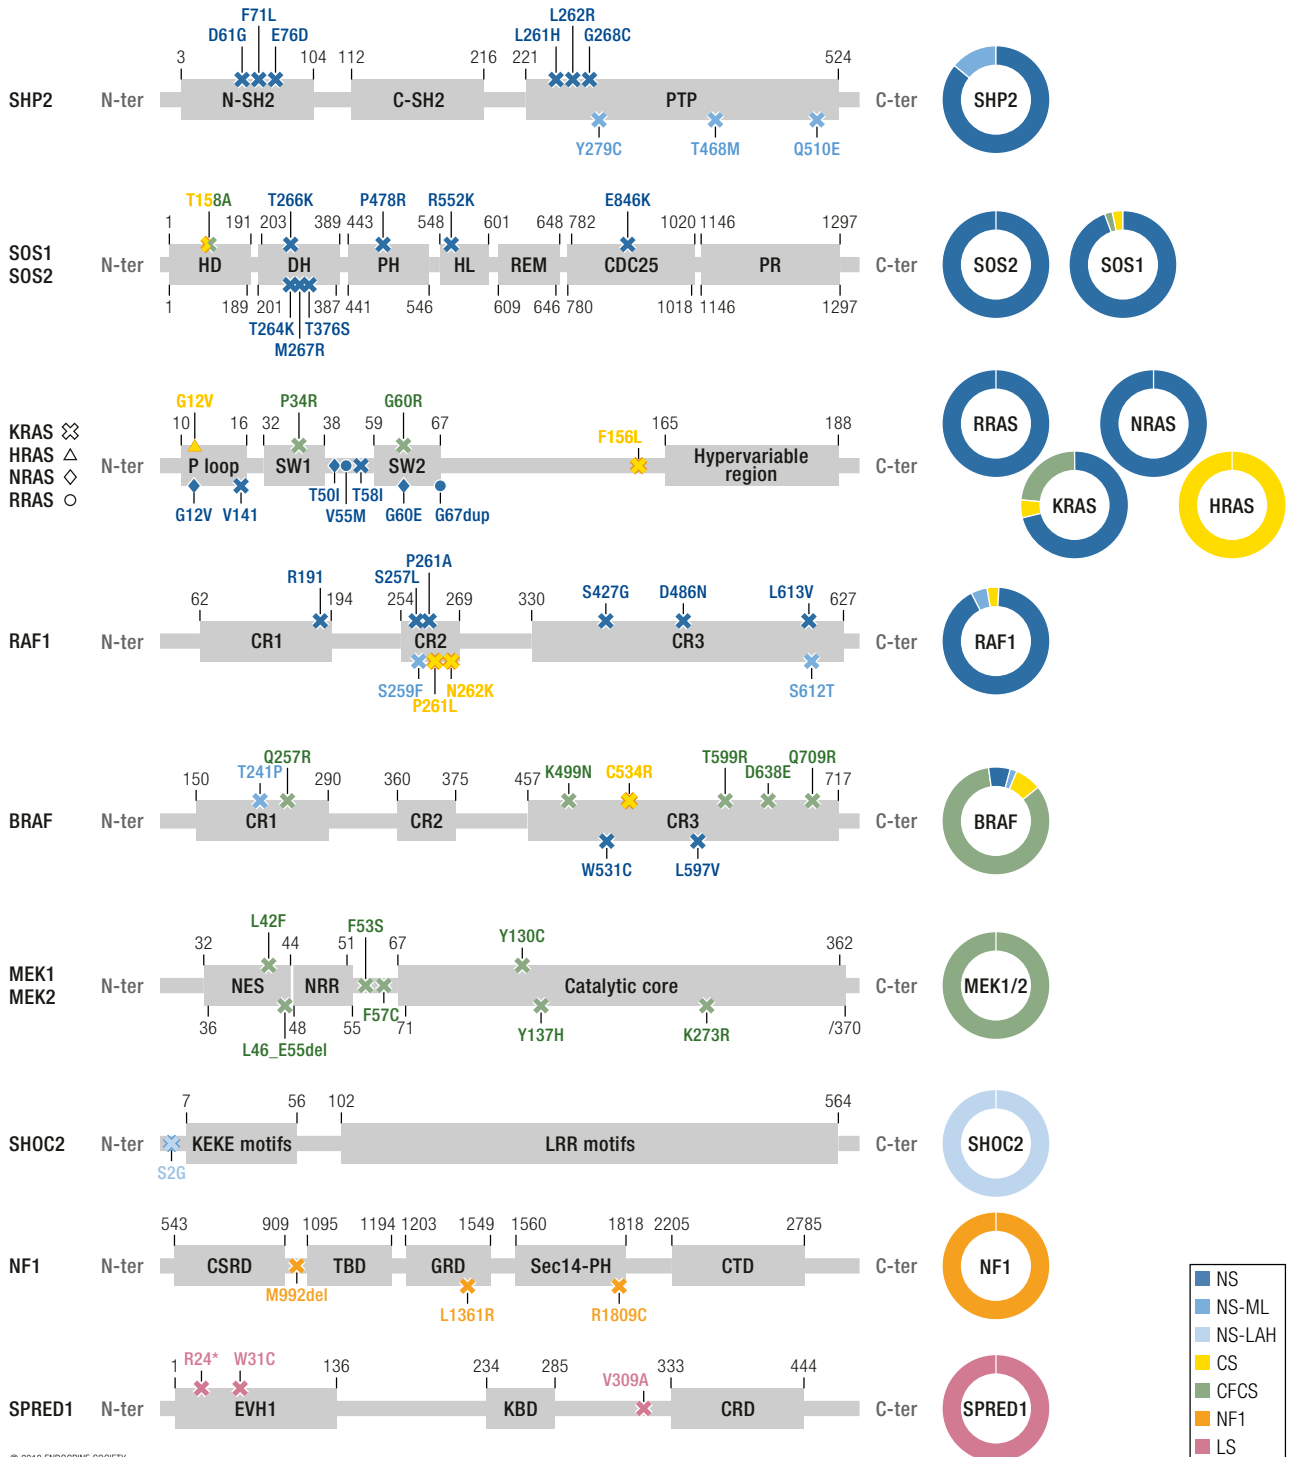

MAPK pathway. In favor of a qualitative effect, although copy number variants encompassing RAS/MAPK genes have been proposed as a cause of RASopathies, they often do not phenocopy syndromes caused by missense mutations (204). Second, the spatiotemporal level of RAS/MAPK hyperactivation can greatly vary depending on the mutated actor (activator, inhibitor, or central component of the pathway). Third, a large combinatorics of events can enhance or reduce the effect of a given mutation: expression-level or cell/tissue specificity of mutated protein or cofactors, stimulus specificity, and mobilization of additional signaling pathways. In the next part, we show that these events determine the penetrance/expressivity of the mutations, explaining that some tolerant cells/tissues maintain a normal function, whereas other turn into pathological dysfunctions.

### Consequences of germline hyperactivation of the RAS/MAPK pathway

#### Cardiac defects

Considerable work has been performed to delineate the mechanisms underlying cardiac defects in RASopathies. Thus, careful analysis of the cardiac defects in zebrafish embryos indicated that expression of NS-associated as well as NS-ML-associated SHP2 variants induced loss of asymmetry, which resulted from impaired cilia function in the Kupffer vesicle, a phenotype that was corrected by pharmacological MEK inhibition (130). Cardiac defects have also been causally linked to RAS/MAPK hyperactivation in several mouse models of NS (143, 146, 147, 150, 205). Expression of NS-associated SHP2 mutants in fetal, but not adult, cardiomyocytes promotes ERK1/2 hyperactivation and is associated with ventricular and valvular abnormalities (143, 205, 206). However, comparison of tissue-specific knockin (KI) mice revealed that endothelial/endocardial-restricted expression of NS-associated SHP2 or SOS1 mutants was sufficient to trigger cardiac valve defects in NS (143, 146, 147). These apparent discrepancies may have an explanation in the time window during which the conditional expression occurs, as well as in the dysregulated communication between both tissues, in particular implying pro-inflammatory cytokines (TNF $\alpha$ , IL6), as recently suggested by Yin *et al.* (149). In *Nfi*<sup>-/-</sup> mice, defects in endothelial cushions resulting in obstructed blood flow were dependent on RAS/MAPK hyperactivation (207, 208). Cardiac defects driven by the CFCS-causing BRAF mutants could also be rescued by prenatal MEK inhibition, alone or in combination with other inhibitors (159, 209).

The pathophysiology of HCM, occurring in ~30% of affected patients and being evolutive throughout life, has been extensively studied in several models, leading to contradictory results. Two elegant studies using tissue-specific KI models of the NS-causing

RAF-L613V and NS-ML-causing SHP2-Y279C mutants highlighted the relative contribution of the different cardiac cell types and of their communication in HCM development. Interestingly, both studies revealed that endothelial/endocardial expression of the mutants promoted cardiomyocyte hypertrophy (149, 152). For the two HCM-prone NS mouse models (*Sos1*<sup>E846K</sup> and *Raf1*<sup>L613V</sup>), rescue experiments revealed a key role of MAPK hyperactivation in HCM development (147, 148). Distinct mechanisms have been proposed for NS-ML-associated HCM (*Ptpn11*<sup>Y279C/+</sup>, *Ptpn11*<sup>Q510E</sup>) (see later section), but the role of RAS/MAPK hyperactivation has not been firmly excluded.

#### Craniofacial defects, growth retardation, and decreased bone mass

Craniofacial defects (underlying facial dysmorphic features in humans) and growth retardation have been documented in several animal models of RASopathies (131, 143, 147, 148, 150, 159, 205). A mouse with neural crest cell-specific expression of the SHP2-Q79R, NS-causing, mutant recapitulated these skull anomalies and revealed delayed ossification of frontal bones and lack of osteogenic differentiation (210). Prenatal treatment with MEK inhibitors was necessary and was sufficient to rescue craniofacial defects, highlighting an effect of RASopathy-associated RAS/MAPK hyperactivation in skull formation during the developmental stage (150).

The mechanisms underlying growth retardation were explored in *Ptpn11*<sup>D61G/+</sup> mice. Growth retardation develops after birth and comes along with reduced IGF-1 levels and GH-evoked RAS/MAPK hyperactivation. Importantly, early treatment with a MEK inhibitor normalized IGF-1 levels and improved the growth of NS mice, implying that hyperactivation of the RAS/MAPK pathway is a driving force for this symptom (79). In addition to endocrine defects, a direct effect (IGF-1 independent) of RAS/MAPK hyperactivation at the growth plate level certainly contributes to growth retardation. Indeed, very recently, NS-associated SHP2 mutants were shown to impair chondrocyte differentiation *in vitro* and *in vivo* during endochondral ossification, resulting in impaired growth plate development and reduced growth of long bones. Noticeably, this defect was rescued by MEK inhibition but not by IGF-1 treatment, although both alleviated growth retardation (211). Regarding decreased bone mass, mice with specific *Nfi* invalidation in bone and/or cartilage progenitors display enhanced osteoclastogenesis, impaired osteoblast differentiation, and defective bone mineralization, which are reverted by chronic inhibition of the RAS/MAPK pathway (165, 212–216).

#### Cognitive deficits

Animal models have also been valuable in deciphering the mechanisms underlying RASopathy-associated cognitive impairment. The behavioral phenotypes

of models of NF1, NS, and LS, notably learning and memory deficits and defective synaptic plasticity, were linked to hippocampal dysfunction, notably altered long-term memory induction, and to defects in neural progenitor specification and were associated with ERK1/2 hyperactivation. Consistently, treatment aimed at reducing RAS/MAPK signaling restored the cognitive defects (113, 217–221). In contrast, although CS mice also displayed enhanced ERK signaling in the brain, their cognitive deficits were not alleviated by RAS/MAPK inhibition (189). Differences in treatment protocols or in quantitative or qualitative RAS/MAPK dysregulation or involvement of alternative or compensatory mechanisms may explain these differences. Supporting this hypothesis, such treatments aimed at improving the cognitive function of patients with NF1 have given rise to divergent results (222–224). Moreover, Altmüller *et al.* (144) recently highlighted the importance of proper ERK dynamics and the existence of additional mechanisms.

### Cancer predisposition

Understanding the pathophysiology of RASopathy-driven tumorigenesis is a major challenge ahead, for which animal models as well as state-of-the-art cellular tools have provided key insights. Although the contribution of RAS/MAPK hyperactivation in tumor development is quite intuitive, given its pro-oncogene function, additional mechanisms may be involved. Indeed, RAS/MAPK hyperactivation has been measured in hematopoietic cells expressing NS/JMML-associated SHP2 mutants, and this dysregulation contributes to leukemogenesis; however, other mechanisms have been identified (171, 225). In the *Kras*<sup>V14I/+</sup> mouse model of NS, chronic MEK inhibition has no effect on myeloproliferative disorder (MPD), whereas it efficiently alleviates other traits of the disease, suggesting that RAS/MAPK hyperactivation is not the main leukemogenic force (150). In contrast, similar treatment abrogated MPD and other tumor growth in mouse models of NF1 (168, 226, 227). In one CS mouse model, RAS/MAPK inhibition efficiently alleviated papilloma development (156).

### Other mechanisms in RASopathy pathophysiology

#### RAS/MAPK “independent” mechanisms

In addition to RAS/MAPK hyperactivation, several signaling pathways have been found to be dysregulated in RASopathies and to participate in their pathophysiology. Thus, a hyperactivation of PI3K/AKT signaling has been reported in models of NS-ML (151, 175, 176, 228), SOS-associated and HRAS-associated CS/CFCS (187, 229, 230), and KRAS-related NS/CFCS (40, 149, 187, 191, 229, 231). From a functional point of view, in several cellular and animal

models of NS-ML, cardiomyocyte hypertrophy was associated with PI3K/AKT/mTOR hyperactivation and HCM was reverted by treatment with rapamycin or AKT inhibitor as well as *AKT1* genetic invalidation (151, 153, 175, 228, 232). Of note, a recent study revealed that cardiac function in an infant with NS-ML and rapidly progressive HCM was improved by 12-week everolimus (a rapamycin analogue) treatment. Although cardiac hypertrophy was not reverted in this time frame, this report provides insights into new therapies to alleviate NS-ML-associated HCM (233). The fact that hyperactivation of both RAS/MAPK and PI3K/AKT pathways give rise to similar HCM-triggering cellular defects is somewhat puzzling. However, the possibility that dysregulation of both pathways contributes jointly to HCM pathophysiology has not been addressed in the same model, although crosstalks between these two pathways are well established (234).

In addition to PI3K dysregulation, CS-associated cardiomyopathies have been causally linked to upregulation of the renin-angiotensin II system, driving a hypertensive phenotype and pointing to angiotensin convertase inhibitors as potent therapies (155).

Further highlighting a wider role for PI3K dysregulation in RASopathy pathophysiology, Kamiya *et al.* (235) recently demonstrated that targeted invalidation of *Nfi* in osteocytes resulted in increased FGF23 levels associated with an osteomalacialike bone phenotype, which was reverted by treatment with PI3K inhibitors. PI3K/AKT hyperactivation has also been measured in hematopoietic cells expressing NS/JMML-associated SHP2 mutants (171, 225). PI3K/AKT/mTOR hyperactivation is also thought to underlie the pathogenesis of multiple lentiginos in NS-ML (236).

Regarding MPD and cancer development, STAT3 hypophosphorylation has been proposed as contributing to leukemogenesis in the context of NS/JMML-associated SHP2 mutants (171, 225). Enhanced dephosphorylation of STAT3 was also recently described in a mouse with pan-neuronal expression of the SHP2 E76K mutant, resulting in hydrocephalus development (237). Interestingly, using iPSC from patients with NS who did or did not develop JMML, Mulero-Navarro *et al.* (238) identified STAT5 hyperactivation as a leukemogenic signature that is associated with upregulation of specific miRNA. Moreover, NS-associated SHP2 mutants have been shown to promote MPD through alterations of mitochondrial aerobic metabolism and reactive oxygen species production (239). Pathophysiological studies identified that the SHP2-D61G mutant promotes MPD by triggering hematopoietic stem cell cycling and increasing the stem cell pool, an effect that could be mediated by proinflammatory cytokines secreted by monocytes in the vicinity of hematopoietic stem cells (240, 241). Regarding NF1, studies demonstrated that development of several tumors, including astrocytomas,

glioblastomas, MPD, and JMML, depends on the loss of other tumor suppressors (242–244).

#### **Endocrine and metabolism imbalance: causes or consequences?**

In addition to established features, a recent metabolic characterization of *Ptpn11*<sup>T468M/+</sup> NS-ML mice revealed a complex metabolic phenotype, associating defective adipogenesis, increased EE, and mitochondria activity/biogenesis as well as improved insulin sensitivity. These different metabolic anomalies resulted in reduced adiposity and improved carbohydrate metabolism, which could be respectively reverted by MEK inhibitor and rapamycin treatment (40). Moreover, neuronal KI of the hyperactive SHP2-D61A mutant resulted in resistance to obesity and increased EE, a phenotype that seems restricted to females because of the synergistic action of estrogens (70). This metabolic phenotype is also thought to be linked to the fact that expression of NS-associated SHP2 mutants is correlated with mitochondrial dysfunction and that patients with CS display increased EE (43, 245), suggesting that metabolic defects may be a common trait of RASopathies. In light of the complex roles of the RAS/MAPK pathway in homeostasis maintenance, one may expect that other dysfunctions of endocrine/metabolic processes will be identified. Moreover, an interesting area of research would be to determine whether such metabolic defects participate in the development of other traits of the diseases. For instance, decreased adiposity or lipodystrophy, as well as imbalance in carbohydrate metabolism or resistance to metabolic hormones (e.g., insulin, leptin), have been associated with the development or worsening of several cardiopathies, notably HCM (246).

#### **Therapeutic Perspectives**

Because genetic diseases by definition affect few individuals, they have long been neglected in pathophysiological research, thereby lacking etiologic treatment. As with other rare diseases, the sole option for patients with RASopathies has long been symptomatic therapies, notably for cardiopathies and growth delay. However, their efficiency and safety are debated, and the identification of specific mutations and pathogenic mechanisms now provides new insights into specific therapies. In particular, with RAS/MAPK hyperactivation as a shared foundation, future strategies for treatment of RASopathies can thrive on therapeutic applications in the field of RAS-driven cancers. Moreover, understanding the long-term, systemic consequences of RASopathy-associated mutations will certainly shed light on additional processes to target for alleviating specific traits.

#### **Symptomatic approaches**

Similar to patients with nonsyndromic congenital heart defects, patients with RASopathies often undergo cardiac surgery, including corrective surgery for valvular malformations (valvuloplasty or primary surgical repair), ventricular septal myectomy for hypertrophy, or even heart transplantation (5). For HCM evolving to congestive heart failure, beneficial effects of beta-blocker therapy have been observed on diastolic function and ventricular remodeling (247). HCM frequently coexists with structural malformations in patients with NS, although they rarely occur in nonsyndromic HCM, which may explain worse late survival in patients with NS (248).

As a symptomatic approach for NS-associated growth retardation and before some pathophysiological mechanisms were identified, treatment with recombinant human growth hormone (rhGH) was approved by the US Food and Drug Administration in 2007 (contrary to the European Medicines Agency); however, its efficiency is still debated. Although most studies reported an enhancement of growth during the first years of treatment, the benefit of long-term therapy is uncertain. To date, only six studies reported adult height or near-adult height, with a height gain SDS varying from 0.6 to 1.4 (~4 to 11 cm, respectively). Better responses were observed with earlier initiation and longer duration of rhGH treatment (17, 249–253).

Results of clinical trials are difficult to compare because of differing protocols (variable enrollment ages, treatment durations, and doses) and outcome criteria. None of these studies was a randomized controlled trial, and major biases affected all of the studies (254). Concerning genotype-phenotype correlations, a lower growth response was initially suggested in patients with NS and a *PTPN11* mutation (255), but it was not confirmed in long-term studies with a similar height gain compared with that of other genotypes (250). However, patients with *PTPN11* mutations presented with more severe short stature and therefore reached a lower adult height. These results may be related to GH insensitivity and/or alteration of the growth plate described in the previous section. Concerns also exist about the use of rhGH treatment in patients with RASopathies according to their tumor predisposition, notably for patients with CS, although GH deficiency has been reported for few cases (256). Regarding cardiopathies, although it was initially postulated that rhGH treatment may have an effect on ventricular development in patients with NS and heart defects, two prospective studies did not find any cause for concern (257, 258).

#### **Targeted approaches**

Given the role of RAS/MAPK hyperactivation in the pathophysiology of RASopathies, therapeutic strategies aimed at reducing this activation seem very

---

*"In patients who have Costello syndrome facial features are coarser than in patients with other RASopathies."*

---



promising. As mentioned before, preclinical studies have demonstrated the potency of pharmacological MEK inhibitors (e.g., U0126, PD0359201) in alleviating several traits of the diseases, including craniofacial defects, growth retardation, cardiopathies, and cognitive deficits (79, 143, 145, 146, 148, 220). Interestingly, because RAS/MAPK dysregulation has also been causally linked to numerous malignancies in humans, one may wonder whether RAS-targeting anticancer therapies can be repurposed for the treatment of RASopathies, at least for noncongenital features (42). Several agents targeting the RAS/MAPK pathway (e.g., farnesyltransferase inhibitors, RAS antagonists, RAF, BRAF, and MEK inhibitors) are currently undergoing clinical trials in the context of cancer. However, substantial side effects and resistance mechanisms for some of them (e.g., RAF inhibitors), arising from relief of negative feedback loops and requiring combinatory therapies, have been reported (47, 259). These effects may impede their transposition to the field of RASopathies, in particular when long-lasting, chronic treatment is necessary. Arguing against this notion, the therapeutic dose for treatment of RASopathies, aimed at normalizing RAS/MAPK activation, would certainly be far below cytotoxic anticancer therapies, thereby limiting both adverse effects and compensatory mechanisms.

A key difference between RASopathies and RAS-driven cancers that could influence therapeutic options is the very nature (germline vs somatic) of the mutations. Indeed, as in any genetic disease, RASopathy-associated germline mutations generate a homeostatic load, notably a sustained RAS/MAPK tonus, as soon as the earliest stage of organismal development, resulting in setting up of specific counter-regulations. Following this logic, targeting the mechanisms (e.g., metabolic, endocrine, structural changes) by which the organism adapts to RAS/MAPK hyperactivation would be more potent than targeting RAS/MAPK itself.

Another limitation for the use of RAS/MAPK-targeting anticancer therapies is that specific mutations could positively, but also negatively, modify the sensitivity of the mutated protein to certain pharmacological inhibitors. Indeed, it was recently demonstrated that several NS-causing SHP2 mutants are unfortunately resistant to the SHP2 allosteric inhibitor SHP099, although this molecule displayed high efficiency, good tolerance, and oral bioavailability (260). Similarly, specific mutations of RAF1 or MEK1 have been shown to make mutated derivatives resistant to inhibitors targeting the corresponding wildtype kinases (261, 262).

Beyond the parallel between RASopathies and RAS-driven cancers, the use of 3-hydroxy-3-methylglutaryl coenzyme A reductase inhibitors, also known as “statins,” has been suggested as a potential therapy for

RASopathies. Indeed, it has been proposed that statins can decrease RAS activity by reducing RAS farnesylation and its localization to the plasma membrane (263). Although this effect may not be restricted to RAS but affects all farnesylated proteins in a non-specific manner, a fine-tuned dosage may normalize RAS activation without affecting other functions in the context of RAS hyperactivation. Thus, the efficacy of statins for the treatment of cognitive deficits has been reported in mouse models of NS and NF1 (218, 220). Statins (e.g., simvastatin) have also been assessed in clinical studies for the treatment of cognitive deficits in children with NF1 with no significant or minor effects but good tolerance (222, 223). Moreover, it was recently reported that statin treatment may improve growth and correct impaired chondrocyte differentiation in an NS mouse model (211). Clinical trials are needed to test whether statin treatment could be a therapeutic strategy to alleviate growth retardation and other noncongenital features in patients with NS. A phase 3, randomized, double-blind, placebo-controlled therapeutic trial is under way to test the efficiency and safety of simvastatin to treat growth and bone abnormalities in children with NS (ClinicalTrials.gov identifier: NCT02713945).

In addition to inhibition of the RAS/MAPK pathway, specific alterations could be targeted. In the case of NS-ML, which has been causally linked to PI3K/AKT/mTOR hyperactivation, pharmacological strategies aimed at inhibiting this pathway (rapamycin, AKT inhibitor) have efficiently alleviated some symptoms of the disease in mouse models and also in patients (151, 228, 233). In patients with NS with activating *PTPN11* mutations, another approach will be the pharmacological inhibition of SHP2 activity, as such molecules have been developed in the cancer field and tested in mouse tumor models (264). In addition, several studies have suggested the contribution of proinflammatory cytokine signaling in RASopathy pathophysiology, notably in HCM development, as treatment with cyclosporine or TGF $\beta$  inhibitors has reversed cardiomyocyte hypertrophy (265, 266). Moreover, current efforts are directed toward the screening of new molecules that could revert specific RASopathy-associated phenotypes in cellular (e.g., iPSC-derived engineered cardiac tissues) and animal models (*C. elegans*, zebrafish) (267).

## Future Directions

Within less than 30 years, considerable advances have been made in the understanding of RASopathy pathophysiology, with the identification of causal mutations and the functional analysis of their pathophysiological consequences. However, many questions remain unanswered. Indeed, there are still

unidentified causal genes for a large proportion of patients diagnosed with RASopathies. For those new genes, as well as for recently identified mutations, functional analyses will enrich our understanding of RASopathies. Future work will also be directed toward identifying the precise mechanisms underlying the similarities and differences between RASopathies and the variable expression of a given mutation. Moreover, although several molecular defects have been identified, notably for major congenital features, they often rely on organ/function-directed approaches, so we still have a fragmentary view of the global pathophysiology.

Major challenges ahead are thus to delineate the integrated effect of RASopathy-associated mutations, taking into account recently identified endocrine and metabolic imbalances and interorgan interactions, and to assess the relative contribution of the different alterations to the global phenotype. The likely

contribution of both autonomous and non-autonomous mechanisms in any investigated function is certainly an important obstacle, which may be overcome by the combined use of multiple tissue-specific and inducible models, as well as multiscale differential studies, modeling, and computation analysis. Moreover, additional levels of complexity will certainly emerge, including genetic, environmental, or age-related and sex-related modifiers. Longitudinal clinical studies on bigger cohorts of patients will certainly provide important insights about such contributions and will allow robust genotype/phenotype correlations. All this knowledge to come will allow the development of personalized medicine aimed at normalizing the more relevant pathogenic mechanisms. Beyond rare diseases, understanding of the consequences of germline activation of RAS/MAPK can have a wider fallout in the field of chronic disorders.

## References

- Noonan JA. Hypertelorism with Turner phenotype: a new syndrome with associated congenital heart disease. *Am J Dis Child.* 1968;**116**(4):373–380.
- Tartaglia M, Gelb BD, Zenker M. Noonan syndrome and clinically related disorders. *Best Pract Res Clin Endocrinol Metab.* 2011;**25**(1):161–179.
- Tartaglia M, Zampino G, Gelb BD. Noonan syndrome: clinical aspects and molecular pathogenesis. *Mol Syndromol.* 2010;**1**(1):2–26.
- Allanson JE, Bohring A, Dörr HG, Dufke A, Gillissen-Kaesbach G, Horn D, König R, Kratz CP, Kutsche K, Pauli S, Raskin S, Rauch A, Turner A, Wieczorek D, Zenker M. The face of Noonan syndrome: does phenotype predict genotype. *Am J Med Genet A.* 2010;**152A**(8):1960–1966.
- Prendiville TV, Gauvreau K, Tworog-Dube E, Patkin L, Kucherlapati RS, Roberts AE, Lacro RV. Cardiovascular disease in Noonan syndrome. *Arch Dis Child.* 2014;**99**(7):629–634.
- Shaw AC, Kalidas K, Crosby AH, Jeffery S, Patton MA. The natural history of Noonan syndrome: a long-term follow-up study. *Arch Dis Child.* 2007;**92**(2):128–132.
- Calcagni G, Limongelli G, D'Ambrosio A, Gesualdo F, Digilio MC, Baban A, Albanese SB, Versacci P, De Luca E, Ferrero GB, Baldassarre G, Agnoletti G, Banaudi E, Marek J, Kaski JP, Tuo G, Russo MG, Pacileo G, Milanese O, Messina D, Marasini M, Cairello F, Formigari R, Brighenti M, Dallapiccola B, Tartaglia M, Marino B. Cardiac defects, morbidity and mortality in patients affected by RASopathies. CARNET study results. *Int J Cardiol.* 2017;**245**:92–98.
- Malaquias AC, Brasil AS, Pereira AC, Arnhold JJ, Mendonca BB, Bertola DR, Jorge AA. Growth standards of patients with Noonan and Noonan-like syndromes with mutations in the RAS/MAPK pathway. *Am J Med Genet A.* 2012;**158A**(11):2700–2706.
- Witt DR, Keena BA, Hall JG, Allanson JE. Growth curves for height in Noonan syndrome. *Clin Genet.* 1986;**30**(3):150–153.
- Ranke MB, Heidemann P, Knupfer C, Enders H, Schmaltz AA, Bierich JR. Noonan syndrome: growth and clinical manifestations in 144 cases. *Eur J Pediatr.* 1988;**148**(3):220–227.
- Romano AA, Allanson JE, Dahlgren J, Gelb BD, Hall B, Pierpont ME, Roberts AE, Robinson W, Takemoto CM, Noonan JA. Noonan syndrome: clinical features, diagnosis, and management guidelines. *Pediatrics.* 2010;**126**(4):746–759.
- Cessans C, Ehlinger V, Arnaud C, Yart A, Capri Y, Barat P, Cammas B, Lacombe D, Coutant R, David A, Baron S, Weill J, Leheup B, Nicolino M, Salles JP, Verloes A, Tauber M, Cave H, Edouard T. Growth patterns of patients with Noonan syndrome: correlation with age and genotype. *Eur J Endocrinol.* 2016;**174**(5):641–650.
- Yart A, Edouard T. Noonan syndrome: an update on growth and development. *Curr Opin Endocrinol Diabetes Obes.* 2018;**25**(1):67–73.
- Noonan JA, Kappelgaard AM. The efficacy and safety of growth hormone therapy in children with Noonan syndrome: a review of the evidence. *Horm Res Paediatr.* 2015;**83**(3):157–166.
- Binder G, Grathwol S, von Loeper K, Blumenstock G, Kaulitz R, Freiberg C, Weibel M, Lissewski C, Zenker M, Paul T. Health and quality of life in adults with Noonan syndrome. *J Pediatr.* 2012;**161**(3):501–505.e1.
- da Silva FM, Jorge AA, Malaquias A, da Costa Pereira A, Yamamoto GL, Kim CA, Bertola D. Nutritional aspects of Noonan syndrome and Noonan-related disorders. *Am J Med Genet A.* 2016;**170**(6):1525–1531.
- Romano AA, Dana K, Bakker B, Davis DA, Hunold JJ, Jacobs J, Lippe B. Growth response, near-adult height, and patterns of growth and puberty in patients with Noonan syndrome treated with growth hormone. *J Clin Endocrinol Metab.* 2009;**94**(7):2338–2344.
- Sharland M, Burch M, McKenna WM, Paton MA. A clinical study of Noonan syndrome. *Arch Dis Child.* 1992;**67**(2):178–183.
- Ankarberg-Lindgren C, Westphal O, Dahlgren J. Testicular size development and reproductive hormones in boys and adult males with Noonan syndrome: a longitudinal study. *Eur J Endocrinol.* 2011;**165**(1):137–144.
- Marcus KA, Sweep CG, van der Burgt I, Noordam C. Impaired Sertoli cell function in males diagnosed with Noonan syndrome. *J Pediatr Endocrinol Metab.* 2008;**21**(11):1079–1084.
- Tartaglia M, Corceddu V, Chang H, Shaw A, Kalidas K, Crosby A, Patton MA, Sorcini M, van der Burgt I, Jeffery S, Gelb BD. Paternal germline origin and sex-ratio distortion in transmission of PTPN11 mutations in Noonan syndrome. *Am J Hum Genet.* 2004;**75**(3):492–497.
- Choudhry KS, Grover M, Tran AA, O'Brian Smith E, Ellis KJ, Lee BH. Decreased bone mineralization in children with Noonan syndrome: another consequence of dysregulated RAS/MAPK pathway? *Mol Genet Metab.* 2012;**106**(2):237–240.
- Baldassarre G, Mussa A, Carli D, Molinatto C, Ferrero GB. Constitutional bone impairment in Noonan syndrome. *Am J Med Genet A.* 2017;**173**(3):692–698.
- Cesarini L, Alfieri P, Pantaleoni F, Vasta I, Cerutti M, Petrangeli V, Mariotti P, Leoni C, Ricci D, Vicari S, Selicorni A, Tartaglia M, Mercuri E, Zampino G. Cognitive profile of disorders associated with dysregulation of the RAS/MAPK signaling cascade. *Am J Med Genet A.* 2009;**149A**(2):140–146.
- Pierpont EI, Tworog-Dube E, Roberts AE. Attention skills and executive functioning in children with Noonan syndrome and their unaffected siblings. *Dev Med Child Neurol.* 2015;**57**(4):385–392.
- Roelofs RL, Janssen N, Wingbermühle E, Kessels RP, Egger JJ. Intellectual development in Noonan syndrome: a longitudinal study. *Brain Behav.* 2016;**6**(7):e00479.
- Artoni A, Selicorni A, Passamonti SM, Lecchi A, Bucciarelli P, Cerutti M, Cianci P, Gianniello F, Martinelli I. Hemostatic abnormalities in Noonan syndrome. *Pediatrics.* 2014;**133**(5):e1299–e1304.
- Sharland M, Patton MA, Talbot S, Chitolie A, Bevan DH. Coagulation-factor deficiencies and abnormal bleeding in Noonan's syndrome. *Lancet.* 1992;**339**(8784):19–21.

29. Kratz CP, Franke L, Peters H, Kohlschmidt N, Kazmierczak B, Finckh U, Bier A, Eichhorn B, Blank C, Kraus C, Kohlhasse J, Pauli S, Wildhardt G, Kutsche K, Auber B, Christmann A, Bachmann N, Mitter D, Cremer FW, Mayer K, Daumer-Haas C, Nevinsky-Stickel-Hinzpeter C, Oeffner F, Schlüter G, Gencik M, Überlacker B, Lisowski C, Schanze I, Greene MH, Spix C, Zenker M. Cancer spectrum and frequency among children with Noonan, Costello, and cardio-facio-cutaneous syndromes. *Br J Cancer*. 2015; **112**(8):1392–1397.
30. Strullu M, Caye A, Lachenaud J, Cassinat B, Gazal S, Fenneteau O, Pouvreau N, Pereira S, Baumann C, Contet A, Sirvent N, Méchinaud F, Guelluc I, Adjaoud D, Paillard C, Alberti C, Zenker M, Chomienne C, Bertrand Y, Baruchel A, Verloes A, Cavé H. Juvenile myelomonocytic leukaemia and Noonan syndrome. *J Med Genet*. 2014; **51**(10): 689–697.
31. Jongmans MC, van der Burgt I, Hoogerbrugge PM, Noordam K, Yntema HG, Nillesen WM, Kuiper RP, Ligtenberg MJ, van Kessel AG, van Krieken JH, Kiemeneij LA, Hoogerbrugge N. Cancer risk in patients with Noonan syndrome carrying a PTPN11 mutation. *Eur J Hum Genet*. 2011; **19**(8):870–874.
32. Sarkozy A, Digilio MC, Dallapiccola B. Leopard syndrome. *Orphanet J Rare Dis*. 2008; **3**(1):13.
33. Limongelli G, Pacileo G, Marino B, Digilio MC, Sarkozy A, Elliott P, Versacci P, Calabro P, De Zorzi A, Di Salvo G, Syrris P, Patton M, McKenna WJ, Dallapiccola B, Calabro R. Prevalence and clinical significance of cardiovascular abnormalities in patients with the LEOPARD syndrome. *Am J Cardiol*. 2007; **100**(4):736–741.
34. Sarkozy A, Conti E, Digilio MC, Marino B, Morini E, Pacileo G, Wilson M, Calabrò R, Pizzuti A, Dallapiccola B. Clinical and molecular analysis of 30 patients with multiple lentiginos LEOPARD syndrome. *J Med Genet*. 2004; **41**(5):e68.
35. Woywodt A, Welzel J, Haase H, Duerholz A, Wiegand U, Potratz J, Sheikhzadeh A. Cardiomyopathic lentiginos/LEOPARD syndrome presenting as sudden cardiac arrest. *Chest*. 1998; **113**(5):1415–1417.
36. Limongelli G, Sarkozy A, Pacileo G, Calabrò P, Digilio MC, Maddaloni V, Gagliardi G, Di Salvo G, Iacomino M, Marino B, Dallapiccola B, Calabrò R. Genotype-phenotype analysis and natural history of left ventricular hypertrophy in LEOPARD syndrome. *Am J Med Genet A*. 2008; **146A**(5):620–628.
37. Lauriol J, Jaffré F, Kontaridis MI. The role of the protein tyrosine phosphatase SHP2 in cardiac development and disease. *Semin Cell Dev Biol*. 2015; **37**: 73–81.
38. Digilio MC, Sarkozy A, de Zorzi A, Pacileo G, Limongelli G, Mingarelli R, Calabrò R, Marino B, Dallapiccola B. LEOPARD syndrome: clinical diagnosis in the first year of life. *Am J Med Genet A*. 2006; **140A**(7):740–746.
39. Carcavilla A, Santome JL, Pinto I, Sanchez-Pozo J, Guillen-Navarro E, Martin-Frías M, Lapunzina P, Ezquieta B. LEOPARD syndrome: a variant of Noonan syndrome strongly associated with hypertrophic cardiomyopathy. *Rev Esp Cardiol (Engl Ed)*. 2013; **66**(5):350–356.
40. Tajan M, Batut A, Cadoudal T, Deleruyelle S, Le Gonidec S, Saint Laurent C, Vomscheid M, Wanecq E, Tréguer K, De Rocca Serra-Nédélec A, Vinel C, Marques M-A, Pozzo J, Kunduzova O, Salles J-P, Tauber M, Raynal P, Cavé H, Edouard T, Valet P, Yart A. LEOPARD syndrome-associated SHP2 mutation confers leanness and protection from diet-induced obesity. *Proc Natl Acad Sci USA*. 2014; **111**(42): E4494–E4503.
41. Gripp KW, Aldinger KA, Bennett JT, Baker L, Tusi J, Powell-Hamilton N, Stabley D, Sol-Church K, Timms AE, Dobyns WB. A novel rasopathy caused by recurrent de novo missense mutations in PPP1CB closely resembles Noonan syndrome with loose anagen hair. *Am J Med Genet A*. 2016; **170**(9): 2237–2247.
42. Rauen KA, Banerjee A, Bishop WR, Lauchle JO, McCormick F, McMahon M, Melese T, Munster PN, Nadaf S, Packer RJ, Sebolt-Leopold J, Viskochil DH. Costello and cardio-facio-cutaneous syndromes: moving toward clinical trials in RASopathies. *Am J Med Genet C Semin Med Genet*. 2011; **157**(2): 136–146.
43. Leoni C, Onesimo R, Giorgio V, Diamanti A, Giorgio D, Martini L, Rossodivita A, Tartaglia M, Zampino G. Understanding growth failure in Costello syndrome: increased resting energy expenditure. *J Pediatr*. 2016; **170**:322–324.
44. Abramowicz A, Gos M. Neurofibromin in neurofibromatosis type 1: mutations in NF1 gene as a cause of disease. *Dev Period Med*. 2014; **18**(3): 297–306.
45. Brems H, Pasmant E, Van Minkelen R, Wimmer K, Upadhyaya M, Legius E, Messiaen L. Review and update of SPRED1 mutations causing Legius syndrome. *Hum Mutat*. 2012; **33**(11):1538–1546.
46. Atay O, Skotheim JM. Spatial and temporal signal processing and decision making by MAPK pathways. *J Cell Biol*. 2017; **216**(2):317–330.
47. Simanshu DK, Nissley DV, McCormick F. RAS proteins and their regulators in human disease. *Cell*. 2017; **170**(1):17–33.
48. Montagner A, Yart A, Dance M, Perret B, Salles JP, Raynal P. A novel role for Gab1 and SHP2 in epidermal growth factor-induced Ras activation. *J Biol Chem*. 2005; **280**:5350–5360.
49. Agazie YM, Hayman MJ. Molecular mechanism for a role of SHP2 in epidermal growth factor receptor signaling. *Mol Cell Biol*. 2003; **23**(21): 7875–7886.
50. Bunda S, Burrell K, Heir P, Zeng L, Alamshebpour A, Kano Y, Raught B, Zhang ZY, Zadeh G, Oh H. Inhibition of SHP2-mediated dephosphorylation of Ras suppresses oncogenesis. *Nat Commun*. 2015; **6**(1):8859.
51. Fey D, Matallanas D, Rauch J, Rukhlenko OS, Kholodenko BN. The complexities and versatility of the RAS-to-ERK signalling system in normal and cancer cells. *Semin Cell Dev Biol*. 2016; **58**: 96–107.
52. Hennig A, Markwart R, Esparza-Franco MA, Ladds G, Rubio I. Ras activation revisited: role of GEF and GAP systems. *Biol Chem*. 2015; **396**(8):831–848.
53. Herrero A, Matallanas D, Kolch W. The spatio-temporal regulation of RAS signalling. *Biochem Soc Trans*. 2016; **44**(5):1517–1522.
54. Tajan M, de Rocca Serra A, Valet P, Edouard T, Yart A. SHP2 sails from physiology to pathology. *Eur J Med Genet*. 2015; **58**(10):509–525.
55. Jang ER, Galperin E. The function of Shoc2: a scaffold and beyond. *Commun Integr Biol*. 2016; **9**(4): e1188241.
56. Koera K, Nakamura K, Nakao K, Miyoshi J, Toyoshima K, Hatta T, Otani H, Aiba A, Katsuki M. K-ras is essential for the development of the mouse embryo. *Oncogene*. 1997; **15**(11):1151–1159.
57. Yao Y, Li W, Wu J, Germann UA, Su MS, Kuida K, Boucher DM. Extracellular signal-regulated kinase 2 is necessary for mesoderm differentiation. *Proc Natl Acad Sci USA*. 2003; **100**(22):12759–12764.
58. Hatano N, Mori Y, Oh-hora M, Kosugi A, Fujikawa T, Nakai N, Niwa H, Miyazaki J, Hamaoka T, Ogata M. Essential role for ERK2 mitogen-activated protein kinase in placental development. *Genes Cells*. 2003; **8**(11):847–856.
59. Saxton TM, Henkemeyer M, Gasca S, Shen R, Rossi DJ, Shalaby F, Feng GS, Pawson T. Abnormal mesoderm patterning in mouse embryos mutant for the SH2 tyrosine phosphatase Shp-2. *EMBO J*. 1997; **16**(9):2352–2364.
60. Giroux S, Tremblay M, Bernard D, Cardin-Girard JF, Aubry S, Larouche L, Rousseau S, Huot J, Landry J, Jeannotte L, Charron J. Embryonic death of Mek1-deficient mice reveals a role for this kinase in angiogenesis in the labyrinthine region of the placenta. *Curr Biol*. 1999; **9**(7):369–376.
61. Wojnowski L, Zimmer AM, Beck TW, Hahn H, Bernal R, Rapp UR, Zimmer A. Endothelial apoptosis in Braf-deficient mice. *Nat Genet*. 1997; **16**(3): 293–297.
62. Buscà R, Pouyssegur J, Lenormand P. ERK1 and ERK2 Map kinases: specific roles or functional redundancy? *Front Cell Dev Biol*. 2016; **4**:53.
63. Dorard C, Vucak G, Baccarini M. Deciphering the RAS/ERK pathway in vivo. *Biochem Soc Trans*. 2017; **45**(1):27–36.
64. Santarpia L, Lippman SM, El-Naggar AK. Targeting the MAPK-RAS-RAF signaling pathway in cancer therapy. *Expert Opin Ther Targets*. 2012; **16**(1): 103–119.
65. Keshet Y, Seger R. The MAP kinase signaling cascades: a system of hundreds of components regulates a diverse array of physiological functions. *Methods Mol Biol*. 2010; **661**:3–38.
66. Lawan A, Bennett AM. Mitogen-activated protein kinase regulation in hepatic metabolism. *Trends Endocrinol Metab*. 2017; **28**(12):868–878.
67. Sidarala V, Kowluru A. The regulatory roles of mitogen-activated protein kinase (MAPK) pathways in health and diabetes: lessons learned from the pancreatic  $\beta$ -cell. *Recent Pat Endocr Metab Immune Drug Discov*. 2017; **10**(2):76–84.
68. Rahmouni K, Sigmund CD, Haynes WG, Mark AL. Hypothalamic ERK mediates the anorectic and thermogenic sympathetic effects of leptin. *Diabetes*. 2009; **58**(3):536–542.
69. Zhang EE, Chapeau E, Hagihara K, Feng GS. Neuronal Shp2 tyrosine phosphatase controls energy balance and metabolism. *Proc Natl Acad Sci USA*. 2004; **101**(45):16064–16069.
70. He Z, Zhang SS, Meng Q, Li S, Zhu HH, Raquil MA, Alderson N, Zhang H, Wu J, Rui L, Cai D, Feng GS. Shp2 controls female body weight and energy balance by integrating leptin and estrogen signals. *Mol Cell Biol*. 2012; **32**(10):1867–1878.
71. Boucher J, Kleinridders A, Kahn CR. Insulin receptor signaling in normal and insulin-resistant states. *Cold Spring Harb Perspect Biol*. 2014; **6**(1): a009191.
72. Matsuo K, Delibegovic M, Matsuo I, Nagata N, Liu S, Bettaieb A, Xi Y, Araki K, Yang W, Kahn BB, Neel BC, Haj FG. Altered glucose homeostasis in mice with liver-specific deletion of Src homology phosphatase 2. *J Biol Chem*. 2010; **285**(51): 39750–39758.
73. Lee SJ, Pfluger PT, Kim JY, Nogueiras R, Duran A, Pagès G, Pouyssegur J, Tschöp MH, Diaz-Meco MT, Moscat J. A functional role for the p62-ERK1 axis in the control of energy homeostasis and adipogenesis. *EMBO Rep*. 2010; **11**(3):226–232.
74. Jager J, Corcelle V, Grémeaux T, Laurent K, Waget A, Pagès G, Binétruy B, Le Marchand-Brustel Y, Burcelin R, Bost F, Tanti JF. Deficiency in the extracellular signal-regulated kinase 1 (ERK1) protects leptin-deficient mice from insulin resistance without affecting obesity. *Diabetologia*. 2011; **54**(1): 180–189.

75. Bost F, Aouadi M, Caron L, Even P, Belmonte N, Prot M, Dani C, Hofman P, Pagès G, Pouyssegur J, Le Marchand-Brustel Y, Binétruy B. The extracellular signal-regulated kinase isoform ERK1 is specifically required for in vitro and in vivo adipogenesis. *Diabetes*. 2005;**54**(2):402–411.
76. Banks AS, McAllister FE, Camporez JP, Zushin PJ, Jurczak MJ, Laznik-Bogoslavski D, Shulman GI, Gygi SP, Spiegelman BM. An ERK/Cdk5 axis controls the diabetogenic actions of PPAR $\gamma$ . *Nature*. 2015;**517**(7534):391–395.
77. Zhang W, Thompson BJ, Hietakangas V, Cohen SM. MAPK/ERK signaling regulates insulin sensitivity to control glucose metabolism in *Drosophila*. *PLoS Genet*. 2011;**7**(12):e1002429.
78. Princen F, Bard E, Sheikf F, Zhang SS, Wang J, Zago WM, Wu D, Trelles RD, Bailly-Maitre B, Kahn CR, Chen Y, Reed JC, Tong GG, Mercola M, Chen J, Feng GS. Deletion of Shp2 tyrosine phosphatase in muscle leads to dilated cardiomyopathy, insulin resistance, and premature death. *Mol Cell Biol*. 2009;**29**(2):378–388.
79. De Rocca Serra-Nédélec A, Edouard T, Tréguer K, Tajan M, Araki T, Dance M, Mus M, Montagner A, Tauber M, Salles JP, Valet P, Neel BC, Raynal P, Yart A. Noonan syndrome-causing SHP2 mutants inhibit insulin-like growth factor 1 release via growth hormone-induced ERK hyperactivation, which contributes to short stature. *Proc Natl Acad Sci USA*. 2012;**109**(11):4257–4262.
80. Zhong J. RAS and downstream RAF-MEK and PI3K-AKT signaling in neuronal development, function and dysfunction. *Biol Chem*. 2016;**397**(3):215–222.
81. He Z, Zhu HH, Bauler TJ, Wang J, Ciaraldi T, Alderson N, Li S, Raquel MA, Ji K, Wang S, Shao J, Henry RR, King PD, Feng GS. Nonreceptor tyrosine phosphatase Shp2 promotes adipogenesis through inhibition of p38 MAP kinase. *Proc Natl Acad Sci USA*. 2013;**110**(1):E79–E88.
82. Rydén M, Arvidsson E, Blomqvist L, Perbeck L, Dicker A, Arner P. Targets for TNF- $\alpha$ -induced lipolysis in human adipocytes. *Biochem Biophys Res Commun*. 2004;**318**(1):168–175.
83. Greenberg AS, Shen WJ, Muliro K, Patel S, Souza SC, Roth RA, Kraemer FB. Stimulation of lipolysis and hormone-sensitive lipase via the extracellular signal-regulated kinase pathway. *J Biol Chem*. 2001;**276**(48):45456–45461.
84. Zhang SS, Hao E, Yu J, Liu W, Wang J, Levine F, Feng GS. Coordinated regulation by Shp2 tyrosine phosphatase of signaling events controlling insulin biosynthesis in pancreatic beta-cells. *Proc Natl Acad Sci USA*. 2009;**106**(18):7531–7536.
85. Fan HY, Liu Z, Shimada M, Sterneck E, Johnson PF, Hedrick SM, Richards JS. MAPK3/1 (ERK1/2) in ovarian granulosa cells are essential for female fertility. *Science*. 2009;**324**(5929):938–941.
86. Hu X, Tang Z, Li Y, Liu W, Zhang S, Wang B, Tian Y, Zhao Y, Ran H, Liu W, Feng GS, Shuai J, Wang H, Lu Z. Deletion of the tyrosine phosphatase Shp2 in Sertoli cells causes infertility in mice. *Sci Rep*. 2015;**5**(1):12982.
87. Cox AD, Fesik SW, Kimmelman AC, Luo J, Der CJ. Drugging the undruggable RAS: mission possible? *Nat Rev Drug Discov*. 2014;**13**(11):828–851.
88. Commisso C, Davidson SM, Soydaner-Azeloglu RG, Parker SJ, Kamphorst JJ, Hackett S, Grabocka E, Nofal M, Drebin JA, Thompson CB, Rabinowitz JD, Metallo CM, Vander Heiden MG, Bar-Sagi D. Macropinocytosis of protein is an amino acid supply route in Ras-transformed cells. *Nature*. 2013;**497**(7451):633–637.
89. Guo JY, Chen HY, Mathew R, Fan J, Strohecker AM, Karsli-Uzunbas G, Kamphorst JJ, Chen G, Lemons JM, Karantz V, Collier HA, Dipaola RS, Gelinis C, Rabinowitz JD, White E. Activated Ras requires autophagy to maintain oxidative metabolism and tumorigenesis. *Genes Dev*. 2011;**25**(5):460–470.
90. Son J, Lysyiotis CA, Ying H, Wang X, Hua S, Ligorio M, Perera RM, Ferrone CR, Mullarky E, Shyh-Chang N, Kang Y, Fleming JB, Bardeesy N, Asara JM, Haigis MC, DePinho RA, Cantley LC, Kimmelman AC. Glutamine supports pancreatic cancer growth through a KRAS-regulated metabolic pathway. *Nature*. 2013;**496**(7443):101–105.
91. White E. Exploiting the bad eating habits of Ras-driven cancers. *Genes Dev*. 2013;**27**(19):2065–2071.
92. Ying H, Kimmelman AC, Lysyiotis CA, Hua S, Chu GC, Fletcher-Sananikone E, Locasale JW, Son J, Zhang H, Colloff JL, Yan H, Wang W, Chen S, Viale A, Zheng H, Paik JH, Lim C, Guimaraes AR, Martin ES, Chang J, Hezel AF, Perry SR, Hu J, Gan B, Xiao Y, Asara JM, Weissleder R, Wang YA, Chin L, Cantley LC, DePinho RA. Oncogenic Kras maintains pancreatic tumors through regulation of anabolic glucose metabolism. *Cell*. 2012;**149**(3):656–670.
93. Tidyman WE, Rauen KA. Expansion of the RASopathies. *Curr Genet Med Rep*. 2016;**4**(3):57–64.
94. Johnston JJ, van der Smagt JJ, Rosenfeld JA, Pagnamenta AT, Alswaid A, Baker EH, Blair E, Borck G, Brinkmann J, Craigen W, Dung VC, Errick L, Everman DB, van Gassen KL, Gulsuner S, Harr MH, Jain M, Kuechler A, Leppig KA, McDonald-McGinn DM, Can NTB, Peleg A, Roeder ER, Rogers RC, Sagi-Dain L, Sapp JC, Schaffer AA, Schanze D, Stewart H, Taylor JC, Verbeeck NE, Walkiewicz MA, Zackai EH, Zwieler C, Members of the Undiagnosed Diseases Network, Zenker M, Lee B, Biesecker LG. Autosomal recessive Noonan syndrome associated with biallelic LZTR1 variants [published online ahead of print February 22, 2018]. *Genet Med*. doi: 10.1038/gim.2017.249.
95. Tidyman WE, Rauen KA. Pathogenetics of the RASopathies. *Hum Mol Genet*. 2016;**25**(R2):R123–R132.
96. Sarkozy A, Carta C, Moretti S, Zampino G, Digilio MC, Pantaleoni F, Scioletti AP, Esposito G, Cordeddu V, Lepri F, Petrangeli V, Dentici ML, Mancini GM, Selicorni A, Rossi C, Mazzanti L, Marino B, Ferrero GB, Silengo MC, Memo L, Stanzial F, Faravelli F, Stuppia L, Puxeddu E, Gelb BD, Dallapiccola B, Tartaglia M. Germline BRAF mutations in Noonan, LEOPARD, and cardiofaciocutaneous syndromes: molecular diversity and associated phenotypic spectrum. *Hum Mutat*. 2009;**30**(4):695–702.
97. Higgins EM, Bos JM, Mason-Suares H, Tester DJ, Ackerman JP, MacRae CA, Sol-Church K, Gripp KW, Urrutia R, Ackerman MJ. Elucidation of MRAS-mediated Noonan syndrome with cardiac hypertrophy. *JCI Insight*. 2017;**2**(5):e91225.
98. Kouz K, Lissewski C, Spranger S, Mitter D, Riess A, Lopez-Gonzalez V, Luttgen S, Aydin H, von Deimling F, Evers C, Hahn A, Hempel M, Issa U, Kahler AK, Lieb A, Villavicencio-Lorini P, Ballesta-Martinez MJ, Nampoothiri S, Ovens-Raeder A, Puchmajerova A, Satanovskij R, Seidel H, Unkelbach S, Zabel B, Kutsche K, Zenker M. Genotype and phenotype in patients with Noonan syndrome and a RIT1 mutation. *Genet Med*. 2016;**18**(12):1226–1234.
99. Yaoita M, Niihori T, Mizuno S, Okamoto N, Hayashi S, Watanabe A, Yokozawa M, Suzumura H, Nakahara A, Nakano Y, Hosokaki T, Ohmori A, Sawada H, Migita O, Mima A, Lapunzina P, Santos-Simarro F, Garcia-Miñaur S, Ogata T, Kawame H, Kurosawa K, Ohashi H, Inoue S, Matsubara Y, Kure S, Aoki Y. Spectrum of mutations and genotype-phenotype analysis in Noonan syndrome patients with RIT1 mutations. *Hum Genet*. 2016;**135**(2):209–222.
100. Lee BH, Kim JM, Jin HY, Kim GH, Choi JH, Yoo HW. Spectrum of mutations in Noonan syndrome and their correlation with phenotypes. *J Pediatr*. 2011;**159**(6):1029–1035.
101. Jhang WK, Choi JH, Lee BH, Kim GH, Yoo HW. Cardiac manifestations and associations with gene mutations in patients diagnosed with RASopathies. *Pediatr Cardiol*. 2016;**37**(8):1539–1547.
102. Lepri F, De Luca A, Stella L, Rossi C, Baldassarre G, Pantaleoni F, Cordeddu V, Williams BJ, Dentici ML, Caputo V, Venanzi S, Bonaguro M, Kavamura I, Faienza MF, Pilotta A, Stanzial F, Faravelli F, Gabrielli O, Marino B, Neri G, Silengo MC, Ferrero GB, Torrente I, Selicorni A, Mazzanti L, Digilio MC, Zampino G, Dallapiccola B, Gelb BD, Tartaglia M. SOS1 mutations in Noonan syndrome: molecular spectrum, structural insights on pathogenic effects, and genotype-phenotype correlations. *Hum Mutat*. 2011;**32**(7):760–772.
103. Cordeddu V, Yin JC, Gunnarsson C, Virtanen C, Drunat S, Lepri F, De Luca A, Rossi C, Ciolfi A, Pugh TJ, Bruxelles A, Priest JR, Pennacchio LA, Lu Z, Danesh A, Quevedo R, Hamid A, Martinelli S, Pantaleoni F, Gnazzo M, Daniele P, Lissewski C, Bocchinfuso G, Stella L, Odent S, Philip N, Favre L, Vlkova M, Seemanova E, Digilio C, Zenker M, Zampino G, Verloes A, Dallapiccola B, Roberts AE, Cavé H, Gelb BD, Neel BC, Tartaglia M. Activating mutations affecting the Dbl homology domain of SOS2 cause Noonan syndrome. *Hum Mutat*. 2015;**36**(11):1080–1087.
104. Martinelli S, Stellacci E, Pannone L, D'Agostino D, Consoli F, Lissewski C, Silvano M, Cencelli G, Lepri F, Maitz S, Pauli S, Rauch A, Zampino G, Selicorni A, Melançon S, Digilio MC, Gelb BD, De Luca A, Dallapiccola B, Zenker M, Tartaglia M. Molecular diversity and associated phenotypic spectrum of germline CBL mutations. *Hum Mutat*. 2015;**36**(8):787–796.
105. Cavé H, Caye A, Ghedira N, Capri Y, Pouvreau N, Fillot N, Trimouille A, Vignal C, Fenneteau O, Alembik Y, Alessandri JL, Blanchet P, Boute O, Bouvagnet P, David A, Dieux Coeslier A, Doray B, Dulac O, Drouin-Garraud V, Gérard M, Héron D, Isidor B, Lacombe D, Lyonnet S, Perrin L, Rio M, Roume J, Sauvion S, Toutain A, Vincent-Delorme C, Willems M, Baumann C, Verloes A. Mutations in RIT1 cause Noonan syndrome with possible juvenile myelomonocytic leukemia but are not involved in acute lymphoblastic leukemia. *Eur J Hum Genet*. 2016;**24**(8):1124–1131.
106. Dentici ML, Sarkozy A, Pantaleoni F, Carta C, Lepri F, Ferese R, Cordeddu V, Martinelli S, Briuglia S, Digilio MC, Zampino G, Tartaglia M, Dallapiccola B. Spectrum of MEK1 and MEK2 gene mutations in cardio-facio-cutaneous syndrome and genotype-phenotype correlations. *Eur J Hum Genet*. 2009;**17**(6):733–740.
107. Cordeddu V, Di Schiavi E, Pennacchio LA, Ma'ayan A, Sarkozy A, Fodale V, Cecchetti S, Cardinale A, Martin J, Schackwitz W, Lipzen A, Zampino G, Mazzanti L, Digilio MC, Martinelli S, Flex E, Lepri F, Bartholdi D, Kutsche K, Ferrero GB, Anichini C, Selicorni A, Rossi C, Tenconi R, Zenker M, Merlo BD, Dallapiccola B, Iyengar R, Bazzicalupo P, Gelb BD, Tartaglia M. Mutation of SHOC2 promotes aberrant protein N-myristoylation and causes Noonan-like syndrome with loose anagen hair. *Nat Genet*. 2009;**41**(9):1022–1026.

108. Hernández-Porras I, Guerra C. Modeling RASopathies with genetically modified mouse models. *Methods Mol Biol.* 2017;**1487**:379–408.
109. Jindal GA, Goyal Y, Burdine RD, Rauen KA, Shvartsman SY. RASopathies: unraveling mechanisms with animal models. *Dis Model Mech.* 2015;**8**(8):769–782.
110. Gutch MJ, Flint AJ, Keller J, Tonks NK, Hengartner MO. The *Caenorhabditis elegans* SH2 domain-containing protein tyrosine phosphatase PTP-2 participates in signal transduction during oogenesis and vulval development. *Genes Dev.* 1998;**12**(4):571–585.
111. Beitel CJ, Clark SG, Horvitz HR. *Caenorhabditis elegans* ras gene *let-60* acts as a switch in the pathway of vulval induction. *Nature.* 1990;**348**(6301):503–509.
112. Wu Y, Han M, Guan KL. MEK-2, a *Caenorhabditis elegans* MAP kinase kinase, functions in Ras-mediated vulval induction and other developmental events. *Genes Dev.* 1995;**9**(6):742–755.
113. Pagani MR, Oishi K, Gelb BD, Zhong Y. The phosphatase SHP2 regulates the spacing effect for long-term memory induction. *Cell.* 2009;**139**(1):186–198.
114. Oishi K, Gaengel K, Krishnamoorthy S, Kamiya K, Kim IK, Ying H, Weber U, Perkins LA, Tartaglia M, Mlodzik M, Pick L, Gelb BD. Transgenic *Drosophila* models of Noonan syndrome causing PTPN11 gain-of-function mutations. *Hum Mol Genet.* 2006;**15**(4):543–553.
115. Oishi K, Zhang H, Gault WJ, Wang CJ, Tan CC, Kim IK, Ying H, Rahman T, Pica N, Tartaglia M, Mlodzik M, Gelb BD. Phosphatase-defective LEOPARD syndrome mutations in PTPN11 gene have gain-of-function effects during *Drosophila* development. *Hum Mol Genet.* 2009;**18**(1):193–201.
116. Gafuik C, Steller H. A gain-of-function germline mutation in *Drosophila ras1* affects apoptosis and cell fate during development. *PLoS One.* 2011;**6**(8):e23535.
117. Yu L, Daniels J, Glaser AE, Wolf MJ. Raf-mediated cardiac hypertrophy in adult *Drosophila*. *Dis Model Mech.* 2013;**6**(4):964–976.
118. The I, Hannigan GE, Cowley GS, Reginald S, Zhong Y, Gusella JF, Hariharan IK, Bernards A. Rescue of a *Drosophila NF1* mutant phenotype by protein kinase A. *Science.* 1997;**276**(5313):791–794.
119. Williams JA, Su HS, Bernards A, Field J, Sehgal A. A circadian output in *Drosophila* mediated by neurofibromatosis-1 and Ras/MAPK. *Science.* 2001;**293**(5538):2251–2256.
120. Tong JJ, Schriener SE, McCleary D, Day BJ, Wallace DC. Life extension through neurofibromin mitochondrial regulation and antioxidant therapy for neurofibromatosis-1 in *Drosophila melanogaster*. *Nat Genet.* 2007;**39**(4):476–485.
121. Buchanan ME, Davis RL. A distinct set of *Drosophila* brain neurons required for neurofibromatosis type 1-dependent learning and memory. *J Neurosci.* 2010;**30**(30):10135–10143.
122. Guo HF, Tong J, Hannan F, Luo L, Zhong Y. A neurofibromatosis-1-regulated pathway is required for learning in *Drosophila*. *Nature.* 2000;**403**(6772):895–898.
123. Ho IS, Hannan F, Guo HF, Hakker I, Zhong Y. Distinct functional domains of neurofibromatosis type 1 regulate immediate versus long-term memory formation. *J Neurosci.* 2007;**27**(25):6852–6857.
124. Walker JA, Gouzi JY, Long JB, Huang S, Maher RC, Xia H, Khalil K, Ray A, Van Vactor D, Bernards R, Bernards A. Genetic and functional studies implicate synaptic overgrowth and ring gland cAMP/PKA signaling defects in the *Drosophila melanogaster* neurofibromatosis-1 growth deficiency. *PLoS Genet.* 2013;**9**(11):e1003958.
125. Walker JA, Tchoudakova AV, McKenney PT, Brill S, Wu D, Cowley GS, Hariharan IK, Bernards A. Reduced growth of *Drosophila* neurofibromatosis 1 mutants reflects a non-cell-autonomous requirement for GTPase-activating protein activity in larval neurons. *Genes Dev.* 2006;**20**(23):3311–3323.
126. Langdon YG, Goetz SC, Berg AE, Swanik JT, Conlon FL. SHP-2 is required for the maintenance of cardiac progenitors. *Development.* 2007;**134**(22):4119–4130.
127. LaBonne C, Whitman M. Mesoderm induction by activin requires FGF-mediated intracellular signals. *Development.* 1994;**120**(2):463–472.
128. Gotoh Y, Masuyama N, Suzuki A, Ueno N, Nishida E. Involvement of the MAP kinase cascade in *Xenopus* mesoderm induction. *EMBO J.* 1995;**14**(11):2491–2498.
129. Umbhauer M, Marshall CJ, Mason CS, Old RW, Smith JC. Mesoderm induction in *Xenopus* caused by activation of MAP kinase. *Nature.* 1995;**376**(6535):58–62.
130. Bonetti M, Paardekooper Overman J, Tessadori F, Noël E, Bakkers J, den Hertog J. Noonan and LEOPARD syndrome Shp2 variants induce heart displacement defects in zebrafish. *Development.* 2014;**141**(9):1961–1970.
131. Jopling C, van Geemen D, den Hertog J. Shp2 knockdown and Noonan/LEOPARD mutant Shp2-induced gastrulation defects. *PLoS Genet.* 2007;**3**(12):e225.
132. Runtuwene V, van Eekelen M, Overvoorde J, Rehmann H, Yntema HG, Nillesen WM, van Haeringen A, van der Burgt I, Burgering B, den Hertog J. Noonan syndrome gain-of-function mutations in NRAS cause zebrafish gastrulation defects. *Dis Model Mech.* 2011;**4**(3):393–399.
133. Razzaque MA, Komoike Y, Nishizawa T, Inai K, Furutani M, Higashinakagawa T, Matsuoka R. Characterization of a novel KRAS mutation identified in Noonan syndrome. *Am J Med Genet A.* 2012;**158A**(3):524–532.
134. Stewart RA, Sanda T, Widlund HR, Zhu S, Swanson KD, Hurlley AD, Bentires-Alj M, Fisher DE, Kontaridis MI, Look AT, Neel BG. Phosphatase-dependent and -independent functions of Shp2 in neural crest cells underlie LEOPARD syndrome pathogenesis. *Dev Cell.* 2010;**18**(5):750–762.
135. Miura K, Wakayama Y, Tanino M, Orba Y, Sawa H, Hatakeyama M, Tanaka S, Sabe H, Mochizuki N. Involvement of EphA2-mediated tyrosine phosphorylation of Shp2 in Shp2-regulated activation of extracellular signal-regulated kinase. *Oncogene.* 2013;**32**(45):5292–5301.
136. Paardekooper Overman J, Yi JS, Bonetti M, Soulsby M, Preisinger C, Stokes MP, Hui L, Silva JC, Overvoorde J, Giansanti P, Heck AJ, Kontaridis MI, den Hertog J, Bennett AM. PZR coordinates Shp2 Noonan and LEOPARD syndrome signaling in zebrafish and mice. *Mol Cell Biol.* 2014;**34**(15):2874–2889.
137. Santoriello C, Deflorian C, Pezzimenti F, Kawakami K, Lanfrancone L, d'Adda di Fagnagna F, Mione M. Expression of H-RASV12 in a zebrafish model of Costello syndrome causes cellular senescence in adult proliferating cells. *Dis Model Mech.* 2009;**2**(1-2):56–67.
138. Anastasaki C, Estep AL, Marais R, Rauen KA, Patton EE. Kinase-activating and kinase-impaired cardio-facio-cutaneous syndrome alleles have activity during zebrafish development and are sensitive to small molecule inhibitors. *Hum Mol Genet.* 2009;**18**(14):2543–2554.
139. Padmanabhan A, Lee JS, Ismat FA, Lu MM, Lawson ND, Kanki JP, Look AT, Epstein JA. Cardiac and vascular functions of the zebrafish orthologues of the type I neurofibromatosis gene NF1. *Proc Natl Acad Sci USA.* 2009;**106**(52):22305–22310.
140. Shin J, Padmanabhan A, de Groh ED, Lee JS, Haidar S, Dahlberg S, Guo F, He S, Wolman MA, Granato M, Lawson ND, Wolfe SA, Kim SH, Solnica-Krezel L, Kanki JP, Ligon KL, Epstein JA, Look AT. Zebrafish neurofibromatosis type 1 genes have redundant functions in tumorigenesis and embryonic development. *Dis Model Mech.* 2012;**5**(6):881–894.
141. Wolman MA, de Groh ED, McBride SM, Jongens TA, Granato M, Epstein JA. Modulation of cAMP and ras signaling pathways improves distinct behavioral deficits in a zebrafish model of neurofibromatosis type 1. *Cell Reports.* 2014;**8**(5):1265–1270.
142. Araki T, Nawa H, Neel BG. Tyrosyl phosphorylation of Shp2 is required for normal ERK activation in response to some, but not all, growth factors. *J Biol Chem.* 2003;**278**(43):41677–41684.
143. Araki T, Chan G, Newbigging S, Morikawa L, Bronson RT, Neel BG. Noonan syndrome cardiac defects are caused by PTPN11 acting in endocardium to enhance endocardial-mesenchymal transformation. *Proc Natl Acad Sci USA.* 2009;**106**(12):4736–4741.
144. Altmüller F, Pothula S, Annamneedi A, Nakhaei-Rad S, Montenegro-Venegas C, Pina-Fernández E, Marini C, Santos M, Schanze D, Montag D, Ahmadian MR, Stork O, Zenker M, Fejtova A. Aberrant neuronal activity-induced signaling and gene expression in a mouse model of RASopathy [published correction appears in *PLoS Genet.* 2017;**13**(6):e1006843]. *PLoS Genet.* 2017;**13**(3):e100684.
145. Nakamura T, Colbert M, Krenz M, Molkentin JD, Hahn HS, Dorn GW II, Robbins J. Mediating ERK 1/2 signaling rescues congenital heart defects in a mouse model of Noonan syndrome. *J Clin Invest.* 2007;**117**(8):2123–2132.
146. Krenz M, Gulick J, Osinska HE, Colbert MC, Molkentin JD, Robbins J. Role of ERK1/2 signaling in congenital valve malformations in Noonan syndrome. *Proc Natl Acad Sci USA.* 2008;**105**(48):18930–18935.
147. Chen PC, Wakimoto H, Conner D, Araki T, Yuan T, Roberts A, Seidman C, Bronson R, Neel B, Seidman JG, Kucherlapati R. Activation of multiple signaling pathways causes developmental defects in mice with a Noonan syndrome-associated *Sos1* mutation. *J Clin Invest.* 2010;**120**(12):4353–4365.
148. Wu X, Simpson J, Hong JH, Kim KH, Thavarajah NK, Backx PH, Neel BG, Araki T. MEK-ERK pathway modulation ameliorates disease phenotypes in a mouse model of Noonan syndrome associated with the *Raf1*(L613V) mutation. *J Clin Invest.* 2011;**121**(3):1009–1025.
149. Yin JC, Platt MJ, Tian X, Wu X, Backx PH, Simpson JA, Araki T, Neel BG. Cellular interplay via cytokine hierarchy causes pathological cardiac hypertrophy in *RAF1*-mutant Noonan syndrome. *Nat Commun.* 2017;**8**:15518.
150. Hernández-Porras I, Fabbiano S, Schuhmacher AJ, Aicher A, Cañamero M, Cámara JA, Cussó L, Desco M, Heeschen C, Mulero F, Bustelo XR, Guerra C, Barbacid M. K-RasV14I recapitulates Noonan syndrome in mice. *Proc Natl Acad Sci USA.* 2014;**111**(46):16395–16400.
151. Marin TM, Keith K, Davies B, Conner DA, Guha P, Kalaitzidis D, Wu X, Lauriol J, Wang B, Bauer M, Bronson R, Franchini KG, Neel BG, Kontaridis MI. Rapamycin reverses hypertrophic cardiomyopathy

- in a mouse model of LEOPARD syndrome-associated PTPN11 mutation. *J Clin Invest*. 2011; **121**(3):1026–1043.
152. Lauriol J, Cabrera JR, Roy A, Keith K, Hough SM, Damilano F, Wang B, Segarra GC, Flessa ME, Miller LE, Das S, Bronson R, Lee KH, Kontaridis MI. Developmental SHP2 dysfunction underlies cardiac hypertrophy in Noonan syndrome with multiple lentigenes. *J Clin Invest*. 2016; **126**(8): 2989–3005.
  153. Schramm C, Fine DM, Edwards MA, Reeb AN, Krenz M. The PTPN11 loss-of-function mutation Q510E-Shp2 causes hypertrophic cardiomyopathy by dysregulating mTOR signaling. *Am J Physiol Heart Circ Physiol*. 2012; **302**(1):H231–H243.
  154. Edwards MA, Crombie K, Schramm C, Krenz M. The Q510E mutation in Shp2 perturbs heart valve development by increasing cell migration. *J Appl Physiol* (1985). 2015; **118**(1):124–131.
  155. Schuhmacher AJ, Guerra C, Sauzeau V, Cañamero M, Bustelo XR, Barbacid M. A mouse model for Costello syndrome reveals an Ang II-mediated hypertensive condition. *J Clin Invest*. 2008; **118**(6): 2169–2179.
  156. Chen X, Mitsutake N, LaPerle K, Akeno N, Zanzonico P, Longo VA, Mitsutake S, Kimura ET, Geiger H, Santos E, Wendel HG, Franco A, Knauf JA, Fagin JA. Endogenous expression of Hras(G12V) induces developmental defects and neoplasms with copy number imbalances of the oncogene. *Proc Natl Acad Sci USA*. 2009; **106**(19): 7979–7984.
  157. Urošević J, Sauzeau V, Soto-Montenegro ML, Reig S, Desco M, Wright EM, Cañamero M, Mulero F, Ortega S, Bustelo XR, Barbacid M. Constitutive activation of B-Raf in the mouse germ line provides a model for human cardio-facio-cutaneous syndrome. *Proc Natl Acad Sci USA*. 2011; **108**(12): 5015–5020.
  158. Andreadi C, Cheung LK, Giblett S, Patel B, Jin H, Mercer K, Kamata T, Lee P, Williams A, McMahon M, Marais R, Pritchard C. The intermediate-activity (L597V) BRAF mutant acts as an epistatic modifier of oncogenic RAS by enhancing signaling through the RAF/MEK/ERK pathway. *Genes Dev*. 2012; **26**(17):1945–1958.
  159. Inoue S, Moriya M, Watanabe Y, Miyagawa-Tomita S, Niihori T, Oba D, Ono M, Kure S, Ogura T, Matsubara Y, Aoki Y. New BRAF knockin mice provide a pathogenetic mechanism of developmental defects and a therapeutic approach in cardio-facio-cutaneous syndrome. *Hum Mol Genet*. 2014; **23**(24): 6553–6566.
  160. Aoidi R, Houde N, Landry-Truchon K, Holter M, Jacquet K, Charron L, Krishnaswami SR, Yu BD, Rauen KA, Bisson N, Newbern J, Charron J. *Mek1<sup>Y130C</sup>* mice recapitulate aspects of human cardio-facio-cutaneous syndrome. *Dis Model Mech*. 2018; **11**(3):dmm031278.
  161. Brannan CI, Perkins AS, Vogel KS, Ratner N, Nordlund ML, Reid SW, Buchberg AM, Jenkins NA, Parada LF, Copeland NG. Targeted disruption of the neurofibromatosis type-1 gene leads to developmental abnormalities in heart and various neural crest-derived tissues. *Genes Dev*. 1994; **8**(9): 1019–1029.
  162. Jacks T, Shih TS, Schmitt EM, Bronson RT, Bernards A, Weinberg RA. Tumour predisposition in mice heterozygous for a targeted mutation in Nf1. *Nat Genet*. 1994; **7**(3):353–361.
  163. Gitler AD, Zhu Y, Ismat FA, Lu MM, Yamauchi Y, Parada LF, Epstein JA. Nf1 has an essential role in endothelial cells. *Nat Genet*. 2003; **33**(1): 75–79.
  164. Xu J, Ismat FA, Wang T, Lu MM, Antonucci N, Epstein JA. Cardiomyocyte-specific loss of neurofibromin promotes cardiac hypertrophy and dysfunction. *Circ Res*. 2009; **105**(3):304–311.
  165. Wang W, Nyman JS, Ono K, Stevenson DA, Yang X, Eleferiou F. Mice lacking Nf1 in osteochondroprogenitor cells display skeletal dysplasia similar to patients with neurofibromatosis type I. *Hum Mol Genet*. 2011; **20**(20):3910–3924.
  166. Zhu Y, Romero MI, Ghosh P, Ye Z, Charnay P, Rushing EJ, Marth JD, Parada LF. Ablation of Nf1 function in neurons induces abnormal development of cerebral cortex and reactive gliosis in the brain. *Genes Dev*. 2001; **15**(7):859–876.
  167. Wu J, Williams JP, Rizvi TA, Kordich JJ, Witte D, Meijer D, Stemmer-Rachamimov AO, Cancelas JA, Ratner N. Plexiform and dermal neurofibromas and pigmentation are caused by Nf1 loss in desert hedgehog-expressing cells. *Cancer Cell*. 2008; **13**(2): 105–116.
  168. Chang T, Krisman K, Theobald EH, Xu J, Akutagawa J, Lauchle JO, Kogan S, Braun BS, Shannon K. Sustained MEK inhibition abrogates myeloproliferative disease in Nf1 mutant mice. *J Clin Invest*. 2013; **123**(1):335–339.
  169. Inoue H, Kato R, Fukuyama S, Nonami A, Taniguchi K, Matsumoto K, Nakano T, Tsuda M, Matsumura M, Kubo M, Ishikawa F, Moon BG, Takatsu K, Nakanishi Y, Yoshimura A. Spred-1 negatively regulates allergen-induced airway eosinophilia and hyperresponsiveness. *J Exp Med*. 2005; **201**(1): 73–82.
  170. Pannone L, Bocchinfuso G, Flex E, Rossi C, Baldassarre G, Lissewski C, Pantaleoni F, Consoli F, Lepri F, Magliozzi M, Anselmi M, Delle Vigne S, Sorge G, Karaer K, Cuturilo G, Sartorio A, Tinschert S, Accadia M, Digilio MC, Zampino G, De Luca A, Cavé H, Zenker M, Gelb BD, Dallapiccola B, Stella L, Ferrero GB, Martinelli S, Tartaglia M. Structural, functional, and clinical characterization of a novel PTPN11 mutation cluster underlying Noonan syndrome. *Hum Mutat*. 2017; **38**(4):451–459.
  171. Araki T, Mohi MG, Ismat FA, Bronson RT, Williams IR, Kutok JL, Yang W, Pao LI, Gilliland DG, Epstein JA, Neel BG. Mouse model of Noonan syndrome reveals cell type- and gene dosage-dependent effects of Ptpn11 mutation. *Nat Med*. 2004; **10**(8): 849–857.
  172. Eminaga S, Bennett AM. Noonan syndrome-associated SHP-2/Ptpn11 mutants enhance SIR-Palpa and PZR tyrosyl phosphorylation and promote adhesion-mediated ERK activation. *J Biol Chem*. 2008; **283**(22):15328–15338.
  173. Fragale A, Tartaglia M, Wu J, Gelb BD. Noonan syndrome-associated SHP2/PTPN11 mutants cause EGF-dependent prolonged GAB1 binding and sustained ERK2/MAPK1 activation. *Hum Mutat*. 2004; **23**(3):267–277.
  174. Krenz M, Yutzey KE, Robbins J. Noonan syndrome mutation Q79R in Shp2 increases proliferation of valve primordia mesenchymal cells via extracellular signal-regulated kinase 1/2 signaling. *Circ Res*. 2005; **97**(8):813–820.
  175. Edouard T, Combier JP, Nédélec A, Bel-Vialar S, Métrich M, Conte-Auriol F, Lyonnet S, Parfait B, Tauber M, Salles JP, Lezoualc'h F, Yart A, Raynal P. Functional effects of PTPN11 (SHP2) mutations causing LEOPARD syndrome on epidermal growth factor-induced phosphoinositide 3-kinase/AKT/glycogen synthase kinase 3 $\beta$  signaling. *Mol Cell Biol*. 2010; **30**(10):2498–2507.
  176. Hanna N, Montagner A, Lee WH, Miteva M, Vidal M, Vidaud M, Parfait B, Raynal P. Reduced phosphatase activity of SHP-2 in LEOPARD syndrome: consequences for PI3K binding on Gab1. *FEBS Lett*. 2006; **580**(10):2477–2482.
  177. Kontaridis MI, Swanson KD, David FS, Barford D, Neel BG. PTPN11 (Shp2) mutations in LEOPARD syndrome have dominant negative, not activating, effects. *J Biol Chem*. 2006; **281**(10):6785–6792.
  178. Martinelli S, Torrieri P, Tinti M, Stella L, Bocchinfuso G, Flex E, Grottesi A, Ceccarini M, Palleschi A, Cesareni G, Castagnoli L, Petrucci TC, Gelb BD, Tartaglia M. Diverse driving forces underlie the invariant occurrence of the T42A, E139D, I282V and T468M SHP2 amino acid substitutions causing Noonan and LEOPARD syndromes. *Hum Mol Genet*. 2008; **17**(13):2018–2029.
  179. Tartaglia M, Martinelli S, Stella L, Bocchinfuso G, Flex E, Cordezzu V, Zampino G, Burgt Iv, Palleschi A, Petrucci TC, Sorcini M, Schoch C, Foa R, Emanuel PD, Gelb BD. Diversity and functional consequences of germline and somatic PTPN11 mutations in human disease. *Am J Hum Genet*. 2006; **78**(2): 279–290.
  180. Yu ZH, Xu J, Walls CD, Chen L, Zhang S, Zhang R, Wu L, Wang L, Liu S, Zhang ZY. Structural and mechanistic insights into LEOPARD syndrome-associated SHP2 mutations. *J Biol Chem*. 2013; **288**(15):10472–10482.
  181. Qiu W, Wang X, Romanov V, Hutchinson A, Lin A, Ruzanov M, Battaile KP, Pai EF, Neel BG, Chirgadze NY. Structural insights into Noonan/LEOPARD syndrome-related mutants of protein-tyrosine phosphatase SHP2 (PTPN11). *BMC Struct Biol*. 2014; **14**:10.
  182. Carvajal-Vergara X, Sevilla A, D'Souza SL, Ang YS, Schaniel C, Lee DF, Yang L, Kaplan AD, Adler ED, Rozov R, Ge Y, Cohen N, Edelman LJ, Chang B, Waghray A, Su J, Pardo S, Lichtenbelt KD, Tartaglia M, Gelb BD, Lemischka IR. Patient-specific induced pluripotent stem-cell-derived models of LEOPARD syndrome. *Nature*. 2010; **465**(7299):808–812.
  183. Tumurkhuu M, Saitoh M, Sato A, Takahashi K, Mimaki M, Takita J, Takeshita K, Hama T, Oka A, Mizuguchi M. Comprehensive genetic analysis of overlapping syndromes of RAS/RAF/MEK/ERK pathway. *Pediatr Int*. 2010; **52**(4):557–562.
  184. Roberts AE, Araki T, Swanson KD, Montgomery KT, Schiripo TA, Joshi VA, Li L, Yassin Y, Tamburino AM, Neel BG, Kucherlapati RS. Germline gain-of-function mutations in SOS1 cause Noonan syndrome. *Nat Genet*. 2007; **39**(1):70–74.
  185. Tartaglia M, Pennacchio LA, Zhao C, Yadav KK, Fodale V, Sarkozy A, Pandit B, Oishi K, Martinelli S, Schackwitz W, Ustaszewska A, Martin J, Bristow J, Carta C, Lepri F, Neri C, Vasta I, Gibson K, Curry CJ, Sigüero JP, Digilio MC, Zampino G, Dallapiccola B, Bar-Sagi D, Gelb BD. Gain-of-function SOS1 mutations cause a distinctive form of Noonan syndrome [published correction appears in *Nat Genet*. 2007; **39**(1): 75–79]. *Nat Genet*. 2007; **39**(2):276.
  186. Yamamoto GL, Agüena M, Gos M, Hung C, Pilch J, Fahiminiya S, Abramowicz A, Cristian I, Budcarilli M, Naslavsky MS, Malakuic AC, Zatz M, Bosamer O, Majewski J, Jorge AA, Pereira AC, Kim CA, Passos-Bueno MR, Bertola DR. Rare variants in SOS2 and LZTR1 are associated with Noonan syndrome. *J Med Genet*. 2015; **52**(6):413–421.
  187. Tumurkhuu M, Saitoh M, Takita J, Mizuno Y, Mizuguchi M. A novel SOS1 mutation in Costello/CFC syndrome affects signaling in both RAS and PI3K pathways. *J Recept Signal Transduct Res*. 2013; **33**(2):124–128.
  188. Nakamura Y, Umeki N, Abe M, Sako Y. Mutation-specific mechanisms of hyperactivation of Noonan

- syndrome SOS molecules detected with single-molecule imaging in living cells. *Sci Rep*. 2017;**7**(1): 14153.
189. Schreiber J, Grimbergen LA, Overwater I, Vaart TV, Stedehouder J, Schuhmacher AJ, Guerra C, Kushner SA, Jaarsma D, Elgersma Y. Mechanisms underlying cognitive deficits in a mouse model for Costello syndrome are distinct from other RASopathy mouse models. *Sci Rep*. 2017;**7**(1):1256.
  190. Pantaleoni F, Lev D, Cirstea IC, Motta M, Lepri FR, Bottero L, Cecchetti S, Linger I, Paolacci S, Flex E, Novelli A, Carè A, Ahmadian MR, Stellacci E, Tartaglia M. Aberrant HRAS transcript processing underlies a distinctive phenotype within the RASopathy clinical spectrum. *Hum Mutat*. 2017;**38**(7):798–804.
  191. Schubert S, Bollag G, Lyubynska N, Nguyen H, Kratz CP, Zenker M, Niemeyer CM, Molven A, Shannon K. Biochemical and functional characterization of germ line KRAS mutations. *Mol Cell Biol*. 2007;**27**(22):7765–7770.
  192. Schubert S, Zenker M, Rowe SL, Böll S, Klein C, Bollag G, van der Burgt I, Musante L, Kalscheuer V, Wehner LE, Nguyen H, West B, Zhang KY, Sistermans E, Rauch A, Niemeyer CM, Shannon K, Kratz CP. Germline KRAS mutations cause Noonan syndrome [published correction appears in *Nat Genet*. 2006;**38**(5):598]. *Nat Genet*. 2006;**38**(3): 331–336.
  193. Cirstea IC, Kutsche K, Dvorsky R, Gremer L, Carta C, Horn D, Roberts AE, Lepri F, Merbitz-Zahradnik T, König R, Kratz CP, Pantaleoni F, Dentici ML, Joshi VA, Kucherlapati RS, Mazzanti L, Mundlos S, Patton MA, Silengo MC, Rossi C, Zampino G, Digilio C, Stuppia L, Seemanova E, Pennacchio LA, Gelb BD, Dallapiccola B, Wittinghofer A, Ahmadian MR, Tartaglia M, Zenker M. A restricted spectrum of NRAS mutations causes Noonan syndrome. *Nat Genet*. 2010;**42**(1):27–29.
  194. Flex E, Jaiswal M, Pantaleoni F, Martinelli S, Strullu M, Fansa EK, Caye A, De Luca A, Lepri F, Dvorsky R, Pannone L, Paolacci S, Zhang SC, Fodale V, Bocchinfuso G, Rossi C, Burkitt-Wright LA, Farrotti A, Stellacci E, Cecchetti S, Ferese R, Bottero L, Castro S, Fenneteau O, Brethon B, Sanchez M, Roberts AE, Yntema HG, Van Der Burgt I, Cianci P, Bondeson ML, Cristina Digilio M, Zampino G, Kerr B, Aoki Y, Loh ML, Palleschi A, Di Schiavi E, Carè A, Selicorni A, Dallapiccola B, Cirstea IC, Stella L, Zenker M, Gelb BD, Cavé H, Ahmadian MR, Tartaglia M. Activating mutations in RRAS underlie a phenotype within the RASopathy spectrum and contribute to leukemogenesis. *Hum Mol Genet*. 2014;**23**(16):4315–4327.
  195. Aoki Y, Niihori T, Banjo T, Okamoto N, Mizuno S, Kurosawa K, Ogata T, Takada F, Yano M, Ando T, Hoshika T, Barnett C, Ohashi H, Kawame H, Hasegawa T, Okutani T, Nagashima T, Hasegawa S, Funayama R, Nagashima T, Nakayama K, Inoue S, Watanabe Y, Ogura T, Matsubara Y. Gain-of-function mutations in RIT1 cause Noonan syndrome, a RAS/MAPK pathway syndrome. *Am J Hum Genet*. 2013;**93**(1):173–180.
  196. Chen PC, Yin J, Yu HW, Yuan T, Fernandez M, Yung CK, Trinh QM, Peltekova VD, Reid JG, Tworog-Dube E, Morgan MB, Muzny DM, Stein L, McPherson JD, Roberts AE, Gibbs RA, Neel BG, Kucherlapati R. Next-generation sequencing identifies rare variants associated with Noonan syndrome. *Proc Natl Acad Sci USA*. 2014;**111**(31):11473–11478.
  197. Wu X, Yin J, Simpson J, Kim KH, Gu S, Hong JH, Bayliss P, Backx PH, Neel BG, Araki T. Increased BRAF heterodimerization is the common pathogenic mechanism for Noonan syndrome-associated RAF1 mutants. *Mol Cell Biol*. 2012;**32**(19):3872–3890.
  198. Rodriguez-Viciana P, Tetsu O, Tidyman WE, Estep AL, Conger BA, Cruz MS, McCormick F, Rauen KA. Germline mutations in genes within the MAPK pathway cause cardio-facio-cutaneous syndrome. *Science*. 2006;**311**(5765):1287–1290.
  199. Kobayashi T, Aoki Y, Niihori T, Cavé H, Verloes A, Okamoto N, Kawame H, Fujiwara I, Takada F, Ohata T, Sakazume S, Ando T, Nakagawa N, Lapunzina P, Meneses AG, Gillissen-Kaesbach G, Wiczorek D, Kurosawa K, Mizuno S, Ohashi H, David A, Philip N, Guliyeva A, Narumi Y, Kure S, Tsuchiya S, Matsubara Y. Molecular and clinical analysis of RAF1 in Noonan syndrome and related disorders: dephosphorylation of serine 259 as the essential mechanism for mutant activation. *Hum Mutat*. 2010;**31**(3):284–294.
  200. Bromberg-White JL, Andersen NJ, Duesbery NS. MEK genomics in development and disease. *Brief Funct Genomics*. 2012;**11**(4):300–310.
  201. Motta M, Chillemi G, Fodale V, Cecchetti S, Coppola S, Stipo S, Corceddu V, Macioce P, Gelb BD, Tartaglia M. SHOC2 subcellular shuttling requires the KEKE motif-rich region and N-terminal leucine-rich repeat domain and impacts on ERK signalling. *Hum Mol Genet*. 2016;**25**(17):3824–3835.
  202. Rojnuangnit K, Xie J, Gomes A, Sharp A, Callens T, Chen Y, Liu Y, Cochran M, Abbott MA, Atkin J, Babovic-Vuksanovic D, Barnett CP, Crenshaw M, Bartholomew DW, Basel L, Bellus G, Ben-Shachar S, Bialer MG, Bick D, Blumberg B, Cortes F, David KL, Destree A, Duat-Rodriguez A, Earl D, Escobar L, Eswara M, Ezquieta B, Fraying IM, Frydman M, Gardner K, Gripp KW, Hernández-Chico C, Heyman K, Ibrahim J, Janssens S, Keena BA, Llano-Rivas I, Leppig K, McDonald M, Misra VK, Mulbury J, Narayanan V, Orenstein N, Galvin-Parton P, Pedro H, Pivnick EK, Powell CM, Randolph L, Raskin S, Rosell J, Rubin K, Seashore M, Schaaf CP, Scheuerle A, Schultz M, Schorry E, Schnur R, Siqueland E, Tkachuk A, Tongard J, Upadhyaya M, Verma IC, Wallace S, Williams C, Zackai E, Zonana J, Lazaro C, Claes K, Korf B, Martin Y, Legius E, Messiaen L. High incidence of Noonan syndrome features including short stature and pulmonic stenosis in patients carrying NF1 missense mutations affecting p.Arg1809: genotype-phenotype correlation. *Hum Mutat*. 2015;**36**(11):1052–1063.
  203. Arafeh R, Qutob N, Emmanuel R, Keren-Paz A, Madore J, Elkhaloun A, Wilmott JS, Gartner JJ, Di Pizio A, Winograd-Katz S, Sindiri S, Rotkopf R, Dutton-Regester K, Johansson P, Pritchard AL, Waddell N, Hill VK, Lin JC, Hevroni Y, Rosenberg SA, Khan J, Ben-Dor S, Niv MY, Ulitsky I, Mann GJ, Scolyer RA, Hayward NK, Samuels Y. Recurrent inactivating RASA2 mutations in melanoma. *Nat Genet*. 2015;**47**(12):1408–1410.
  204. Lissewski C, Kant SG, Stark Z, Schanze I, Zenker M. Copy number variants including RAS pathway genes: how much RASopathy is in the phenotype? *Am J Med Genet A*. 2015;**167**(11):2685–2690.
  205. Nakamura T, Gulick J, Pratt R, Robbins J. Noonan syndrome is associated with enhanced pERK activity, the repression of which can prevent craniofacial malformations. *Proc Natl Acad Sci USA*. 2009;**106**(36):15436–15441.
  206. Dalin MG, Zou Z, Scharin-Täng M, Safari R, Karlsson C, Bergo MO. Myocardial KRAS(G12D) expression does not cause cardiomyopathy in mice. *Cardiovasc Res*. 2014;**101**(2):229–235.
  207. Ismat FA, Xu J, Lu MM, Epstein JA. The neurofibromin GAP-related domain rescues endothelial but not neural crest development in Nf1 mice. *J Clin Invest*. 2006;**116**(9):2378–2384.
  208. Lakkis MM, Epstein JA. Neurofibromin modulation of ras activity is required for normal endocardial-mesenchymal transformation in the developing heart. *Development*. 1998;**125**(22):4359–4367.
  209. Anastasaki C, Rauen KA, Patton EE. Continual low-level MEK inhibition ameliorates cardio-facio-cutaneous phenotypes in zebrafish. *Dis Model Mech*. 2012;**5**(4):546–552.
  210. Nakamura T, Gulick J, Colbert MC, Robbins J. Protein tyrosine phosphatase activity in the neural crest is essential for normal heart and skull development. *Proc Natl Acad Sci USA*. 2009;**106**(27): 11270–11275.
  211. Tajan M, Perin-Grandjean J, Beton N, Gennero I, Capilla F, Neel BG, Araki T, Valet P, Tauber M, Salles JP, Yart A, Edouard T. Noonan syndrome-causing SHP2 mutants impair ERK-dependent chondrocyte differentiation during endochondral bone growth. *Hum Mol Genet*. 2018;**27**(13): 2276–2289.
  212. Wang W, Nyman JS, Moss HE, Gutierrez G, Mundy GR, Yang X, Eleferiou F. Local low-dose lovastatin delivery improves the bone-healing defect caused by Nf1 loss of function in osteoblasts. *J Bone Miner Res*. 2010;**25**(7):1658–1667.
  213. Zhang W, Rhodes SD, Zhao L, He Y, Zhang Y, Shen Y, Yang D, Wu X, Li X, Yang X, Park SJ, Chen S, Turner C, Yang FC. Primary osteopathy of vertebrae in a neurofibromatosis type 1 murine model. *Bone*. 2011;**48**(6):1378–1387.
  214. Rhodes SD, Wu X, He Y, Chen S, Yang H, Staser KW, Wang J, Zhang P, Jiang C, Yokota H, Dong R, Peng X, Yang X, Murthy S, Azhar M, Mohammad KS, Xu M, Guise TA, Yang FC. Hyperactive transforming growth factor- $\beta$ 1 signaling potentiates skeletal defects in a neurofibromatosis type 1 mouse model. *J Bone Miner Res*. 2013;**28**(12):2476–2489.
  215. Sharma R, Wu X, Rhodes SD, Chen S, He Y, Yuan J, Li J, Yang X, Li X, Jiang L, Kim ET, Stevenson DA, Viskochil D, Xu M, Yang FC. Hyperactive Ras/MAPK signaling is critical for tibial nonunion fracture in neurofibromin-deficient mice. *Hum Mol Genet*. 2013;**22**(23):4818–4828.
  216. Rhodes SD, Zhang W, Yang D, Yang H, Chen S, Wu X, Li X, Yang X, Mohammad KS, Guise TA, Bergner AL, Stevenson DA, Yang FC. Dystrophic spinal deformities in a neurofibromatosis type 1 murine model. *PLoS One*. 2015;**10**(3):e0119093.
  217. Costa RM, Federov NB, Kogan JH, Murphy GG, Stern J, Ohno M, Kucherlapati R, Jacks T, Silva AJ. Mechanism for the learning deficits in a mouse model of neurofibromatosis type 1. *Nature*. 2002;**415**(6871):526–530.
  218. Li W, Cui Y, Kushner SA, Brown RA, Jentsch JD, Frankland PW, Cannon TD, Silva AJ. The HMG-CoA reductase inhibitor lovastatin reverses the learning and attention deficits in a mouse model of neurofibromatosis type 1. *Curr Biol*. 2005;**15**(21): 1961–1967.
  219. Wang Y, Kim E, Wang X, Novitsch BG, Yoshikawa K, Chang LS, Zhu Y. ERK inhibition rescues defects in fate specification of Nf1-deficient neural progenitors and brain abnormalities. *Cell*. 2012;**150**(4): 816–830.
  220. Lee YS, Ehninger D, Zhou M, Oh JY, Kang M, Kwak C, Ryu HH, Butz D, Araki T, Cai Y, Balaji J, Sano Y, Nam CI, Kim HK, Kaang BK, Burger C, Neel BG, Silva AJ. Mechanism and treatment for learning and memory deficits in mouse models of Noonan syndrome. *Nat Neurosci*. 2014;**17**(12):1736–1743.
  221. Denayer E, Ahmed T, Brems H, Van Woerden G, Borgesius NZ, Callaerts-Vegh Z, Yoshimura A, Hartmann D, Elgersma Y, D'Hooge R, Legius E, Balschun D. Spred1 is required for synaptic plasticity

- and hippocampus-dependent learning. *J Neurosci*. 2008;**28**(53):14443–14449.
222. Krab LC, de Goede-Bolder A, Aarsen FK, Pluijm SM, Bouman MJ, van der Geest JN, Lequin M, Catsman CE, Arts WF, Kushner SA, Silva AJ, de Zeeuw CI, Moll HA, Elgersma Y. Effect of simvastatin on cognitive functioning in children with neurofibromatosis type 1: a randomized controlled trial. *JAMA*. 2008;**300**(3):287–294.
  223. van der Vaart T, Plasschaert E, Rietman AB, Renard M, Oostenbrink R, Vogels A, de Wit MC, Descheemaeker MJ, Vergouwe Y, Catsman-Berreoets CE, Legius E, Elgersma Y, Moll HA. Simvastatin for cognitive deficits and behavioural problems in patients with neurofibromatosis type 1 (NF1-SIMCODA): a randomised, placebo-controlled trial. *Lancet Neurol*. 2013;**12**(11):1076–1083.
  224. Mainberger F, Jung NH, Zenker M, Wahlländer U, Freudenberg L, Langer S, Berweck S, Winkler T, Straube A, Heinen F, Granström S, Mautner VF, Lidzba K, Mall V. Lovastatin improves impaired synaptic plasticity and phasic alertness in patients with neurofibromatosis type 1. *BMC Neurol*. 2013;**13**(1):131.
  225. Zhang W, Chan RJ, Chen H, Yang Z, He Y, Zhang X, Luo Y, Yin F, Moh A, Miller LC, Payne RM, Zhang ZY, Fu XY, Shou W. Negative regulation of Stat3 by activating PTPN11 mutants contributes to the pathogenesis of Noonan syndrome and juvenile myelomonocytic leukemia. *J Biol Chem*. 2009;**284**(33):22353–22363.
  226. Jessen WJ, Miller SJ, Jousma E, Wu J, Rizvi TA, Brundage ME, Eaves D, Widemann B, Kim MO, Dombi E, Sabo J, Hardiman Dudley A, Niwa-Kawakita M, Page GP, Giovannini M, Aronow BJ, Cripe TP, Ratner N. MEK inhibition exhibits efficacy in human and mouse neurofibromatosis tumors. *J Clin Invest*. 2013;**123**(1):340–347.
  227. Watson AL, Anderson LK, Greeley AD, Keng VW, Rahrmann EP, Halfond AL, Powell NM, Collins MH, Rizvi T, Moertel CL, Ratner N, Largaespada DA. Co-targeting the MAPK and PI3K/AKT/mTOR pathways in two genetically engineered mouse models of schwann cell tumors reduces tumor grade and multiplicity. *Oncotarget*. 2014;**5**(6):1502–1514.
  228. Wang J, Chandrasekhar V, Abbadessa G, Yu Y, Schwartz B, Kontaridis MI. In vivo efficacy of the AKT inhibitor ARQ 092 in Noonan syndrome with multiple lentiginos-associated hypertrophic cardiomyopathy. *PLoS One*. 2017;**12**(6):e0178905.
  229. Rosenberger G, Meien S, Kutsche K. Oncogenic HRAS mutations cause prolonged PI3K signaling in response to epidermal growth factor in fibroblasts of patients with Costello syndrome. *Hum Mutat*. 2009;**30**(3):352–362.
  230. Gremer L, De Luca A, Merbitz-Zahradnik T, Dallapiccola B, Morlot S, Tartaglia M, Kutsche K, Ahmadian MR, Rosenberger G. Duplication of Glu37 in the switch I region of HRAS impairs effector/GAP binding and underlies Costello syndrome by promoting enhanced growth factor-dependent MAPK and AKT activation. *Hum Mol Genet*. 2010;**19**(5):790–802.
  231. Dasgupta B, Yi Y, Chen DY, Weber JD, Gutmann DH. Proteomic analysis reveals hyperactivation of the mammalian target of rapamycin pathway in neurofibromatosis 1-associated human and mouse brain tumors. *Cancer Res*. 2005;**65**(7):2755–2760.
  232. Roy R, Krenz M. Heterozygous deletion of AKT1 rescues cardiac contractility, but not hypertrophy, in a mouse model of Noonan syndrome with multiple lentiginos. *J Mol Cell Cardiol*. 2017;**112**:83–90.
  233. Hahn A, Lauriol J, Thul J, Behnke-Hall K, Logeswaran T, Schänzer A, Bögürücü N, Garvalov BK, Zenker M, Gelb BD, von Gerlach S, Kandolf R, Kontaridis MI, Schranz D. Rapidly progressive hypertrophic cardiomyopathy in an infant with Noonan syndrome with multiple lentiginos: palliative treatment with a rapamycin analog. *Am J Med Genet A*. 2015;**167A**(4):744–751.
  234. De Luca A, Maiello MR, D'Alessio A, Pergameno M, Normanno N. The RAS/RAF/MEK/ERK and the PI3K/AKT signalling pathways: role in cancer pathogenesis and implications for therapeutic approaches. *Expert Opin Ther Targets*. 2012;**16**(Suppl 2):S17–S27.
  235. Kamiya N, Yamaguchi R, Aruwajoye O, Kim AJ, Kuroyanagi G, Phipps M, Adapala NS, Feng JQ, Kim HK. Targeted disruption of NF1 in osteocytes increases FGF23 and osteoid with osteomalacia-like bone phenotype. *J Bone Miner Res*. 2017;**32**(8):1716–1726.
  236. Motegi S, Yokoyama Y, Ogino S, Yamada K, Uchiyama A, Perera B, Takeuchi Y, Ohnishi H, Ishikawa O. Pathogenesis of multiple lentiginos in LEOPARD syndrome with PTPN11 gene mutation. *Acta Derm Venereol*. 2015;**95**(8):978–984.
  237. Zheng H, Yu WM, Waclaw RR, Kontaridis MI, Neel BG, Qu CK. Gain-of-function mutations in the gene encoding the tyrosine phosphatase SHP2 induce hydrocephalus in a catalytically dependent manner. *Sci Signal*. 2018;**11**(522):ea01591.
  238. Mulero-Navarro S, Sevilla A, Roman AC, Lee DF, D'Souza SL, Pardo S, Riess I, Su J, Cohen N, Schaniel C, Rodriguez NA, Baccarini A, Brown BD, Cave H, Caye A, Strullu M, Yalcin S, Park CY, Dhandapani PS, Yongchao G, Edelmann L, Bahieg S, Raynal P, Flex E, Tartaglia M, Moore KA, Lemischka IR, Gelb BD. Myeloid dysregulation in a human induced pluripotent stem cell model of PTPN11-associated juvenile myelomonocytic leukemia. *Cell Rep*. 2015;**13**(3):504–515.
  239. Xu D, Zheng H, Yu WM, Qu CK. Activating mutations in protein tyrosine phosphatase Ptpn11 (Shp2) enhance reactive oxygen species production that contributes to myeloproliferative disorder. *PLoS One*. 2013;**8**(5):e63152.
  240. Xu D, Wang S, Yu WM, Chan G, Araki T, Bunting KD, Neel BG, Qu CK. A germline gain-of-function mutation in Ptpn11 (Shp-2) phosphatase induces myeloproliferative disease by aberrant activation of hematopoietic stem cells. *Blood*. 2010;**116**(18):3611–3621.
  241. Dong L, Yu WM, Zheng H, Loh ML, Bunting ST, Pauly M, Huang C, Zhou M, Broxmeyer HE, Scadden DT, Qu CK. Leukaemogenic effects of Ptpn11 activating mutations in the stem cell microenvironment. *Nature*. 2016;**539**(7628):304–308.
  242. Zhu Y, Guignard F, Zhao D, Liu L, Burns DK, Mason RP, Messing A, Parada LF. Early inactivation of p53 tumor suppressor gene cooperating with NF1 loss induces malignant astrocytoma. *Cancer Cell*. 2005;**8**(2):119–130.
  243. Wiesner SM, Geurts JL, Diers MD, Bergerson RJ, Hasz DE, Morgan KJ, Largaespada DA. NF1 mutant mice with p19ARF gene loss develop accelerated hematopoietic disease resembling acute leukemia with a variable phenotype. *Am J Hematol*. 2011;**86**(7):579–585.
  244. Dodd RD, Mito JK, Eward WC, Chitalia R, Sachdeva M, Ma Y, Barretina J, Dodd L, Kirsch DG. NF1 deletion generates multiple subtypes of soft-tissue sarcoma that respond to MEK inhibition. *Mol Cancer Ther*. 2013;**12**(9):1906–1917.
  245. Lee I, Pecinova A, Pecina P, Neel BG, Araki T, Kucherlapati R, Roberts AE, Hüttemann M. A suggested role for mitochondria in Noonan syndrome. *Biochim Biophys Acta*. 2010;**1802**(2):275–283.
  246. Lupsa BC, Sachdev V, Lungu AO, Rosing DR, Gorden P. Cardiomyopathy in congenital and acquired generalized lipodystrophy: a clinical assessment. *Medicine (Baltimore)*. 2010;**89**(4):245–250.
  247. Östman-Smith I. Beta-blockers in pediatric hypertrophic cardiomyopathies. *Rev Recent Clin Trials*. 2014;**9**(2):82–85.
  248. Hickey EJ, Mehta R, Elmi M, Asoh K, McCrindle BW, Williams WG, Manlhiot C, Benson L. Survival implications: hypertrophic cardiomyopathy in Noonan syndrome. *Congenit Heart Dis*. 2011;**6**(1):41–47.
  249. Kirk JM, Betts PR, Butler GE, Donaldson MD, Dunger DB, Johnston DI, Kelnar CJ, Price DA, Wilton P; UK KIGS Executive Group. Short stature in Noonan syndrome: response to growth hormone therapy. *Arch Dis Child*. 2001;**84**(5):440–443.
  250. Noordam C, Peer PG, Francois I, De Schepper J, van den Burgt I, Otten BJ. Long-term GH treatment improves adult height in children with Noonan syndrome with and without mutations in protein tyrosine phosphatase, non-receptor-type 11. *Eur J Endocrinol*. 2008;**159**(3):203–208.
  251. Osio D, Dahlgren J, Wikland KA, Westphal O. Improved final height with long-term growth hormone treatment in Noonan syndrome. *Acta Paediatr*. 2005;**94**(9):1232–1237.
  252. Raaijmakers R, Noordam C, Karagiannis G, Gregory JW, Hertel NT, Sipilä I, Otten BJ. Response to growth hormone treatment and final height in Noonan syndrome in a large cohort of patients in the KIGS database. *J Pediatr Endocrinol Metab*. 2008;**21**(3):267–273.
  253. Tamburrino F, Gibertoni D, Rossi C, Scarano E, Perri A, Montanari F, Fantini MP, Pession A, Tartaglia M, Mazzanti L. Response to long-term growth hormone therapy in patients affected by RASopathies and growth hormone deficiency: Patterns of growth, puberty and final height data. *Am J Med Genet A*. 2015;**167**(11):2786–2794.
  254. Giacomozi C, Deodati A, Shaikh MG, Ahmed SF, Cianfarani S. The impact of growth hormone therapy on adult height in Noonan syndrome: a systematic review. *Horm Res Paediatr*. 2015;**83**(3):167–176.
  255. Limal JM, Parfait B, Cabrol S, Bonnet D, Leheup B, Lyonnet S, Vidaud M, Le Bouc Y. Noonan syndrome: relationships between genotype, growth, and growth factors. *J Clin Endocrinol Metab*. 2006;**91**(1):300–306.
  256. Stein RI, Legault L, Daneman D, Weksberg R, Hamilton J. Growth hormone deficiency in Costello syndrome. *Am J Med Genet A*. 2004;**129A**(2):166–170.
  257. Noordam C, Draaisma JM, van den Nieuwenhof J, van der Burgt I, Otten BJ, Daniels O. Effects of growth hormone treatment on left ventricular dimensions in children with Noonan's syndrome. *Horm Res*. 2001;**56**(3-4):110–113.
  258. Cotterill AM, McKenna WJ, Brady AF, Sharland M, Elswai M, Yamada M, Camacho-Hübner C, Kelnar CJ, Dunger DB, Patton MA, Savage MO. The short-term effects of growth hormone therapy on height velocity and cardiac ventricular wall thickness in children with Noonan's syndrome. *J Clin Endocrinol Metab*. 1996;**81**(6):2291–2297.
  259. Karoulia Z, Gavathiotis E, Poulikakos PI. New perspectives for targeting RAF kinase in human cancer. *Nat Rev Cancer*. 2017;**17**(11):676–691.



260. Sun X, Ren Y, Gunawan S, Teng P, Chen Z, Lawrence HR, Cai J, Lawrence NJ, Wu J. Selective inhibition of leukemia-associated SHP2E69K mutant by the allosteric SHP2 inhibitor SHP099. *Leukemia*. 2018;**32**: 1246–1249.
261. Gao Y, Chang MT, McKay D, Na N, Zhou B, Yaeger R, Torres NM, Muniz K, Drosten M, Barbacid M, Caponigro G, Stuart D, Moebitz H, Solit DB, Abdel-Wahab O, Taylor BS, Yao Z, Rosen N. Allele-specific mechanisms of activation of MEK1 mutants determine their properties. *Cancer Discov*. 2018;**8**(5): 648–661.
262. Antony R, Emery CM, Sawyer AM, Garraway LA. C-RAF mutations confer resistance to RAF inhibitors. *Cancer Res*. 2013;**73**(15):4840–4851.
263. Wang M, Casey PJ. Protein prenylation: unique fats make their mark on biology. *Nat Rev Mol Cell Biol*. 2016;**17**(2):110–122.
264. Chen YN, LaMarche MJ, Chan HM, Fekkes P, Garcia-Fortanet J, Acker MG, Antonakos B, Chen CH, Chen Z, Cooke VG, Dobson JR, Deng Z, Fei F, Firestone B, Fodor M, Fridrich C, Gao H, Grunenfelder D, Hao HX, Jacob J, Ho S, Hsiao K, Kang ZB, Karki R, Kato M, Larrow J, La Bonte LR, Lenoir F, Liu G, Liu S, Majumdar D, Meyer MJ, Palermo M, Perez L, Pu M, Price E, Quinn C, Shakya S, Shultz MD, Slisz J, Venkatesan K, Wang P, Warmuth M, Williams S, Yang G, Yuan J, Zhang JH, Zhu P, Ramsey T, Keen NJ, Sellers WR, Stams T, Fortin PD. Allosteric inhibition of SHP2 phosphatase inhibits cancers driven by receptor tyrosine kinases. *Nature*. 2016;**535**(7610):148–152.
265. Josowitz R, Mulero-Navarro S, Rodriguez NA, Falce C, Cohen N, Ullian EM, Weiss LA, Rauen KA, Sobie EA, Gelb BD. Autonomous and non-autonomous defects underlie hypertrophic cardiomyopathy in BRAF-mutant hiPSC-derived cardiomyocytes. *Stem Cell Reports*. 2016;**7**(3):355–369.
266. Dhandapani PS, Fabris F, Tonk R, Illaste A, Karakikes I, Sorourian M, Sheng J, Hajjar RJ, Tartaglia M, Sobie EA, Lebeche D, Gelb BD. Cyclosporine attenuates cardiomyocyte hypertrophy induced by RAF1 mutants in Noonan and LEOPARD syndromes. *J Mol Cell Cardiol*. 2011;**51**(1):4–15.
267. Cashman TJ, Josowitz R, Johnson BV, Gelb BD, Costa KD. Human engineered cardiac tissues created using induced pluripotent stem cells reveal functional characteristics of BRAF-mediated hypertrophic cardiomyopathy. *PLoS One*. 2016;**11**(1): e0146697.

### Acknowledgments

We thank all past and present staff members and collaborators, in particular the NSEuroNet European consortium, for fruitful scientific discussions.

**Financial Support:** This work was supported in part by grants from INSERM (to A.Y.), Toulouse University Hospital (CHU), DGOS (to T.E.), and ERA-Net for research programs on rare diseases (E-Rare, project: NSEuroNet: European

Network on Noonan Syndrome and Related Disorders; to A.Y.).

**Current Affiliation:** M. Tajan's current affiliation is Francis Crick Institute, London, England.

**Correspondence and Reprint Requests:** Armelle Yart, PhD, INSERM UMR 1048, Institute of Cardiovascular and Metabolic Diseases (I2MC), University of Toulouse Paul Sabatier, Avenue J Poulhes, 31432 Toulouse, France. E-mail: [Armelle.Yart@inserm.fr](mailto:Armelle.Yart@inserm.fr).

**Disclosure Summary:** The authors have nothing to disclose.

\*These authors contributed equally to this work.

### Abbreviations

CFCS, cardio-facio-cutaneous syndrome; CR, conserved region; CS, Costello syndrome; EE, energy expenditure; ERK, MAPK extracellular signal-regulated kinases; GAP, GTPase-activating protein; GTP, guanosine triphosphate; HCM, hypertrophic cardiomyopathy; iPSC, induced pluripotent stem cell; JMML, juvenile myelomonocytic leukemia; KI, knockin; LOF, loss-of-function; LS, Legius syndrome; MEK, MAPK ERK kinases; MIM, Mendelian Inheritance in Men; MPD, myeloproliferative disorder; NF1, type I neurofibromatosis; NS, Noonan syndrome; NS-LAH, Noonan-like syndrome with loose anagen hair; NS-ML, Noonan syndrome with multiple lentigines; PI3K, phosphatidylinositol 3-kinase; PTP, protein tyrosine phosphatase; *PTPN11*, protein tyrosine phosphatase non-receptor type 11; PVS, pulmonary valve stenosis; rhGH, recombinant human growth hormone; SDS, standard deviation score.
